# Supplementary material for: Flood damage functions for rice: Synthesizing evidence and building data-driven models
Source: Copernicus journal article supplement (doi:10.5194/egusphere-2025-3706), 2025-09-18
Supplement: Supplementary file 1 [file egusphere-2025-3706-supplement.pdf]

Supplementary Information for:

Flood damage functions for rice:

Synthesizing evidence and building data-driven models

**Authors**

Alina Bill-Weilandt<sup>1, 2, 3, 4</sup> (ORCID ID: 0009-0003-0746-9768)\*

Nivedita Sairam<sup>3</sup> (ORCID ID: 0000-0003-4611-9894)

Dennis Wagenaar<sup>2</sup> (ORCID ID: 0000-0001-5215-6435)

Kasra Rafiezadeh Shahi<sup>3, 4</sup> (ORCID ID: 0000-0003-3666-4223)

Heidi Kreibich<sup>3</sup> (ORCID ID: 0000-0001-6274-3625)

Perrine Hamel<sup>1, 2</sup> (ORCID ID: 0000-0002-3083-8205)

David Lallemant<sup>1, 2</sup> (ORCID ID: 0000-0001-5759-9972)

<sup>1</sup> Earth Observatory of Singapore, Nanyang Technological University, Singapore

<sup>2</sup> Asian School of the Environment, Nanyang Technological University, Singapore

<sup>3</sup> Section 4.4 Hydrology, GFZ Helmholtz Centre for Geosciences, 14473 Potsdam, Germany

<sup>4</sup> Potsdam Institute for Climate Impact Research (PIK), Member of the Leibniz Association, Potsdam, Germany

\* Corresponding author: Alina Bill-Weilandt (alina001@e.ntu.edu.sg)

# 1 Data

## 1.1 Household survey in Northeast Thailand

This section describes the collection of data needed for the model development. We conducted a household survey in the Lower Songkhram River Basin, in Northeast Thailand, from March 11-28, 2023, in collaboration with the Stockholm Environment Institute Asia and Nakhon Phanom University. Figure S1 shows the selected villages on a map and Table S1 gives an overview of the village selection criteria. The selected villages have a total population of 2904 households. To achieve a sample with a confidence level of 95%, we had to survey at least 352 households, equivalent to 12% of all households, according to Yamane's formula (Yamane, 1967):

$$n = \frac{N}{1 + N * e^2} = \frac{2904}{1 + 2904 * 0.05^2} = 352$$

where  $n$  is the sample size,  $N$  is the population size, and  $e$  is the level of precision (e.g., a 95% confidence level would be  $p=0.2$ ). We increased the sample size to 20 percent of the total population, which was 584 households, equivalent to a 96% confidence level. The target of interviewing 20 percent of the households per village resulted in village-level confidence levels ranging from 80 to 89 percent. Table S2 presents the number of households surveyed per village and the village-level confidence levels. Within each village, streets and houses within the selected streets were sampled randomly. If nobody was present in a selected house, the household in the neighboring house was interviewed. In participating households, the household head, defined as the person familiar with the household finances, was interviewed. The minimum age for participation was set at 20 years, the national majority age in Thailand.

A group of trained surveyors conducted face-to-face interviews and recorded the results in the open-source data collection software KoboToolbox. The household survey covered data beyond the flood damage data that is not used in the present paper. The data collection met the international standards and expectations regarding research ethics and integrity established at Nanyang Technological University (NTU) and was approved under NTU's Institutional Review Board (IRB) Protocol IRB-2022-1105.

*Fig. S1: Map of villages in the Lower Songkhram River Basin, in Northeast Thailand, where the household survey was conducted. The inset map shows the Songkhram River Basin (in orange), delineated from a Digital Elevation Map (Wagenaar et al., n.d.), and the location of the main map (in blue). The base map by ESRI (n.d.), administrative boundaries by Royal Thai Survey Department (2022), and rivers and water bodies by GISTA (2018) were used. Sources of the village locations and the Ramsar site map are provided in Table S1.*

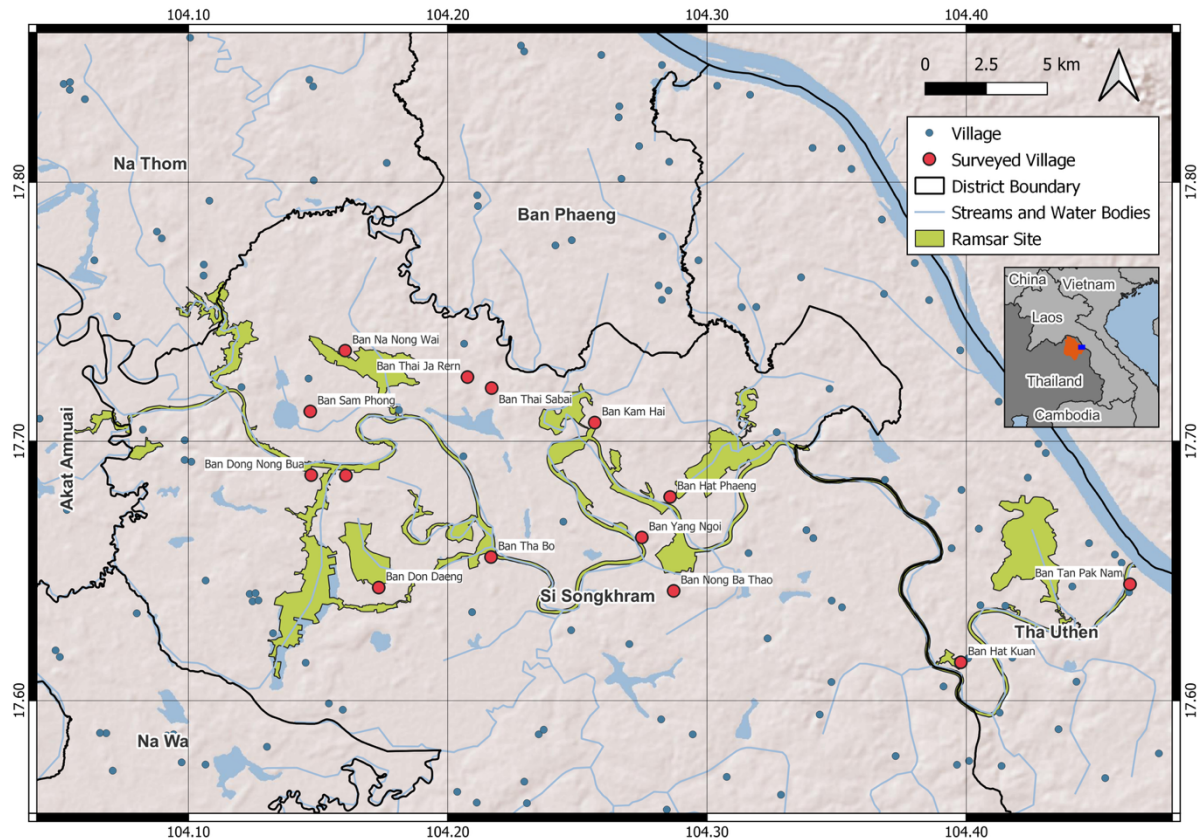

*Table S1: Criteria and data for the selection of villages for the household survey. Applying selection criteria 1 to 6 (right column) led to a list of 13 villages in six subdistricts. Aiming to include two villages per subdistrict (criterion 7), we added two villages where SEI had established working relationships with the village heads (criterion 6).*

| Data                                    | Year        | Data (data format)                                                                                    | Source                                                                                                                                                                                                      | Selection criteria                                                                                                                                                                                                             |
|-----------------------------------------|-------------|-------------------------------------------------------------------------------------------------------|-------------------------------------------------------------------------------------------------------------------------------------------------------------------------------------------------------------|--------------------------------------------------------------------------------------------------------------------------------------------------------------------------------------------------------------------------------|
| Village location                        | 2017        | village locations (shapefile)                                                                         | (Naresuan University Geoinformatics Community and Sharing (NUGIS), 2014)                                                                                                                                    | 1. Villages that are located within a 5km radius from Ramsar site.<br><i>Assessment in QGIS: Got intersection of Ramsar site (plus 5km in all directions) and villages.</i>                                                    |
| Ramsar site shape                       | 2020        | Ramsar site boundaries (shapefile)                                                                    | (Ramsar Site Information Service (RSIS), 2020)                                                                                                                                                              |                                                                                                                                                                                                                                |
| Historical flood records                | 2013 - 2017 | number of flood occurrences per village (yes/no for each year) (table)                                | (Thai Department of Disaster Prevention and Mitigation, Ministry of Interior, 2017)                                                                                                                         | 2. Villages that experienced flooding in at least three years from 2013-2020.<br><i>Assessment in QGIS: Got intersection of flood extent and village points to assess if village experienced flooding.</i>                     |
|                                         | 2018 - 2020 | maximum flood extent per year and village points (shapefiles)                                         | <i>Flood extent:</i><br>(Geo-Informatics and Space Technology Development Agency (GISTDA), 2023)<br><i>Village points:</i><br>(Naresuan University Geoinformatics Community and Sharing (NUGIS), 2014)      |                                                                                                                                                                                                                                |
| Community Forest Projects               | 2020        | community forest project status per village (active, expired, none) (table)                           | (Royal Forest Department, Community Forest Management Promotion Section, 2022)                                                                                                                              | 3. Villages that have a community forest that is actively managed (under an ongoing project by the Royal Forest Department or an expired project, which is usually passed on to the community afterwards).                     |
| Average annual village household income | 2021        | average annual household income in THB per village (excel)                                            | <i>Household income:</i> 2021 Basic Needs (BMN) Data (Ministry of the Interior. Department of Community Development (MOI-CDD), 2021)<br><i>Minimum wage:</i> (Thai Ministry of Labor. Wage Committee, 2022) | 4. Villages with a mean annual household income of less than THB 200,000 in 2021. <sup>1</sup>                                                                                                                                 |
|                                         | 2021        | village population statistics (excel)                                                                 | (Bureau of Registration Administration Thailand (BORA), 2021)                                                                                                                                               |                                                                                                                                                                                                                                |
| Access to subsidiary roads              | 2014        | Roads (shapefile)                                                                                     | (Naresuan University Geoinformatics Community and Sharing (NUGIS), 2014)                                                                                                                                    | 5. Villages within 1.5 km from a subsidiary road.                                                                                                                                                                              |
| Focus group conversation subdistricts   | 2023        | list of villages and subdistricts where SEI had conducted focus group discussions by Feb. 2023 (list) | List of subdistricts provided by SEI: Tha Bo Songkhram, Ban Kha, Si Songkhram, Sam Phong, Hat Phaeng, Chai Buri                                                                                             | 6. Villages located in one of the six subdistricts where the SEI had conducted focus group discussions and hence had already established partnerships with the village heads or representatives of community-led organizations |
| List of selected villages               | -           | Not applicable                                                                                        | Not applicable                                                                                                                                                                                              | 7. At least two villages per selected subdistrict should be included.                                                                                                                                                          |

<sup>1</sup> This income threshold is slightly higher than two minimum wages per household. In 2022, the Wage Committee under the Ministry of Labor set a minimum wage per day for the Province of Nakhon Phanom at THB 335. Assuming 247 working days per year (based on the year 2023) and six days of annual leave (the minimum annual leave after one year of employment as per the annual leave policy), the minimum annual income is THB 80,735. For a household with two persons with minimum wages, the income would amount to THB 161,470. The international poverty line and the lower middle income class poverty line are equivalent to THB 10,658.00 and THB 18,068 per year respectively (WBG 2023).

Table S2: Number of households surveyed per village in the Province of Nakhon Phanom, in Thailand, and Confidence Interval (CI). The total no. of households per village is based on the 2022 population statistics (Bureau of Registration Administration Thailand (BORA), 2021)

| #     | Village                 | Subdistrict,<br>District | District     | Total no. of<br>households<br>in the village | Target no. of<br>households | No. of<br>households<br>surveyed | Difference<br>of target<br>and<br>surveyed<br>no. | CI    |
|-------|-------------------------|--------------------------|--------------|----------------------------------------------|-----------------------------|----------------------------------|---------------------------------------------------|-------|
| 1     | Ban Don<br>Daeng        | Tha Bo<br>Songkhram      | Si Songkhram | 302                                          | 60                          | 60                               | 0                                                 | 88.4% |
| 2     | Ban Tha Bo<br>Songkhram | Tha Bo<br>Songkhram      |              | 234                                          | 47                          | 47                               | 0                                                 | 87.0% |
| 3     | Ban Tha Bo              | Tha Bo<br>Songkhram      |              | 262                                          | 52                          | 52                               | 0                                                 | 87.6% |
| 4     | Ban Dong<br>Nong Bua    | Ban Kha                  |              | 120                                          | 24                          | 24                               | 0                                                 | 81.7% |
| 5     | Ban Tha<br>Kong         | Ban Kha                  |              | 96                                           | 19                          | 19                               | 0                                                 | 79.5% |
| 6     | Ban Yang<br>Ngoi        | Si<br>Songkhram          |              | 197                                          | 39                          | 38                               | -1                                                | 85.4% |
| 7     | Ban Nong<br>Ba Thao     | Si<br>Songkhram          |              | 310                                          | 62                          | 62                               | 0                                                 | 88.6% |
| 8     | Ban Na<br>Nong Wai      | Sam Phong                |              | 231                                          | 46                          | 48                               | +2                                                | 87.2% |
| 9     | Ban Khok<br>Klang       | Sam Phong                |              | 95                                           | 19                          | 19                               | 0                                                 | 79.5% |
| 10    | Ban Sam<br>Phong        | Sam Phong                |              | 165                                          | 33                          | 33                               | 0                                                 | 84.4% |
| 11    | Ban Thai<br>Sabai       | Sam Phong                |              | 150                                          | 30                          | 32                               | +2                                                | 84.3% |
| 12    | Ban Hat<br>Phaeng       | Hat Phaeng               |              | 147                                          | 29                          | 30                               | +1                                                | 83.7% |
| 13    | Ban Kam<br>Hai          | Hat Phaeng               |              | 192                                          | 38                          | 38                               | 0                                                 | 85.5% |
| 14    | Ban Tan Pak<br>Nam      | Chai Buri                | Tha Uthen    | 200                                          | 40                          | 41                               | +1                                                | 86.1% |
| 15    | Ban Hat<br>Kuan         | Chai Buri                |              | 203                                          | 41                          | 41                               | 0                                                 | 86.0% |
| Total |                         |                          |              | 2904                                         | 579                         | 584                              | +5                                                | 96.3% |

## 1.2 Growth stages of rice plants

One predictor used in the developed flood damage models is the growth stage of the plants. The duration from seeding to harvest is 134 days in the wet season in Myanmar, which is in line with the duration of 135 days provided by the International Rice Research Institute. In Thailand, the plant growth duration in the wet season is 155 days, about 20 days longer than in Myanmar. The indicated plant height at each growth stage is in a similar range as in Myanmar, with slightly larger plants in the early growth stages and slightly smaller plants in the late growth stages (Fig. S2).

*Fig. S2: Growth stages of rice plants and their durations (adapted from Shrestha et al., 2021). The data used for the Myanmar model (light-colored boxes) by Shrestha et al. (2021) is based on data by the International Rice Research Institute (IRRI, 2007) and the Bureau of Agricultural Statistics, Department of Agriculture, Philippines. The plant growth duration for the Philippines of 135 days is in line with the duration of 134 days for Myanmar, according to the survey by Shrestha et al. (n=174). The data for Thailand collected by the authors in a household survey (n=584) indicates the mean plant height (n=404) and the duration from seeding to harvest for the wet season (n=472) and the dry season (n=127).*

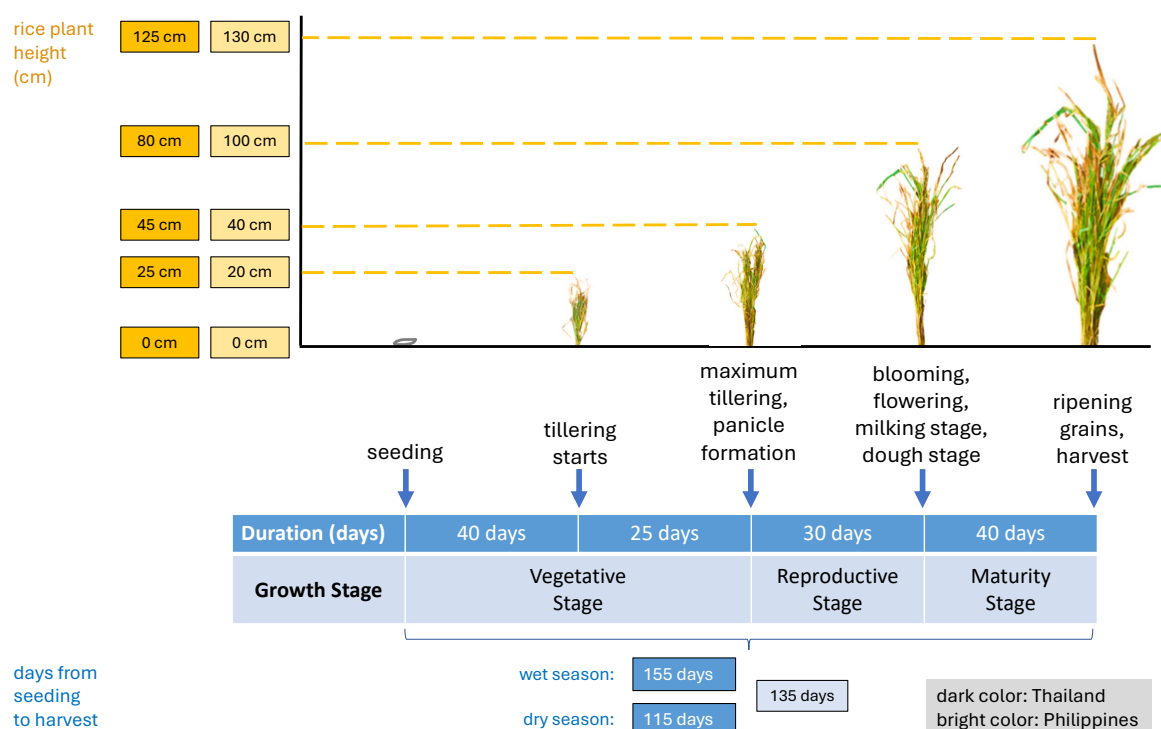

## 2 Model development

This section introduces each flood damage model developed in this study, including the Random Forest (RF) model, Bayesian Regression Model (BRM), and stage-damage functions (SDF) in a deterministic and a probabilistic version. The description of the developed models builds on previous studies on flood damage models for companies which inspired the methodological framework of the present study (Schoppa et al., 2020; Sieg et al., 2017). We compare the performance of these models with ramp functions found in the literature review (Shrestha et al., 2021). 10-fold Cross Validation is conducted as part of the model development (Fig. S3). For the 10-fold CV, we created 10 combinations of training and validation sets.

Fig. S3: Visualization of 10-fold cross validation (Figure adapted from James et al., 2013). The damage dataset was randomly split into 10 roughly equally large groups. Each of the ten test sets, also called hold-out sets or validation sets (shown in orange), served to test the model's performance. The remaining data was used to train the model (shown in blue). The model fitting and validation was repeated ten times. For each fold, we estimated three performance scores, one of which is the mean absolute error (MAE).

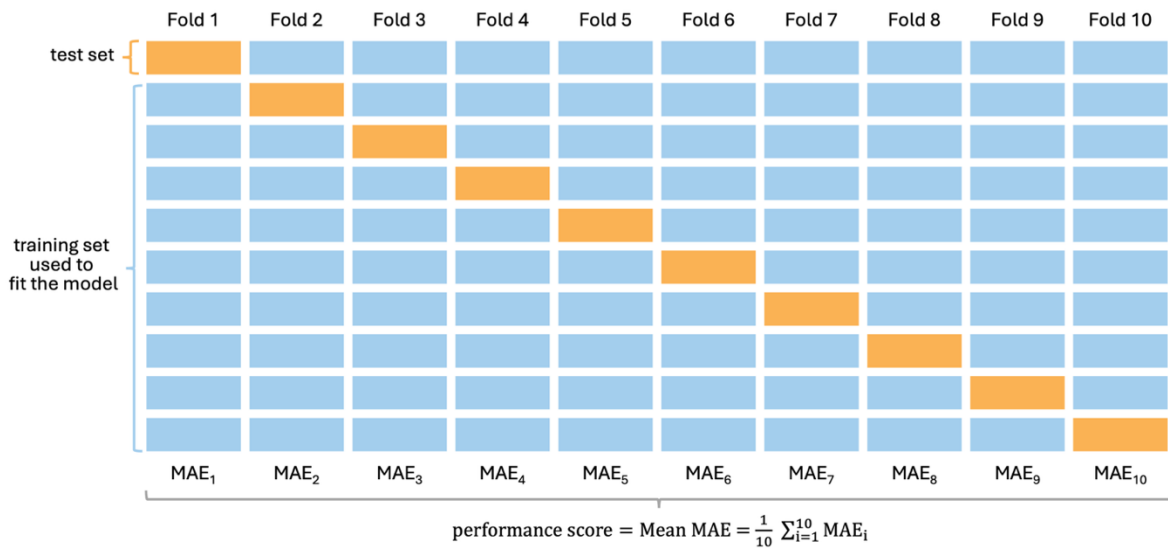

### 2.1 Random Forest

Machine learning algorithms aim to identify patterns, classify data, or reveal relationships in large data sets. Decision tree methods stratify or segment the predictor variables into multiple subsets of the data, referred to as “regions.” The ensemble of splitting rules used to divide the predictor space into regions can be represented by a tree. Decision tree-based models can combine multiple trees to make more accurate predictions (James et al., 2013).

One example within the family of decision tree methods is a Random Forest, which is an ensemble of tree-structured classifiers (Breiman, 2001). Supp. Fig. 4 visualizes the creation of Random Forests in a 10-fold CV. In a Random Forest, the input training data represents the root node of a single tree and is split recursively (branching) into subsamples (the tree nodes). Splitting is based on a threshold value of the predictor, leading to a subsample that minimizes heterogeneity in the response variable. The response value is obtained from the final subsamples (the leaf nodes). To predict the response variable for a given data point, the values of its predictor variables determine which leaf node is used. If the response variable is categorical, the model returns the most frequent class in the leaf node's subsample, also referred to as the mode (classification tree). For continuous response variables, the response value is the mean value of the leaf node's subsample (regression tree). The response variable (relative yield loss in percent) of the Random Forest models trained in this study is continuous. In the following, we therefore focus on regression trees (Sieg et al., 2017).

Random Forests use bootstrap sampling, also referred to as bagging, to select the bootstrap sample, which serves as the subsample for training a single tree. About one third of the training set is hold out, they are called Out-of-Bag (OOB) observations. The OOB sample are used internally to estimate the performance of the resulting model and to evaluate the variable importance (Sieg et al., 2017).

Different algorithms exist to build a single tree, like the Classification And Regression Tree (CART) algorithm, THAID, C4.5, and the Conditional Inference Tree (CIT) algorithm (Wei et al., 2015). The CART is a commonly used algorithm (Breiman et al., 1984). However, CART algorithms (Breiman et al., 1984) are

prone to a variable selection bias, as they tends to favor continuous predictors with more potential splits (White and Liu, 1994). The CIT algorithm, developed by Hothorn et al. (2006), overcomes this limitation by employing unbiased recursive partitioning based on permutation tests.

The CART and the CIT algorithms differ in how they select and split variables (splitting criterion) and how they define leaf nodes (stop criterion). CART uses an exhaustive search on a random sample of  $m$  variables to identify the variable with the best split. The best split is the one that maximizes node impurity, measured as the mean square error of the response values in the subsample. Splitting in CART ends when a threshold of node impurity is met or no further splits are possible. To mitigate overfitting within each tree, OOB observations are held out. In contrast, CIT applies hypothesis testing at each node to assess the association between predictors and the response. In an RF of CITs such as `partykit::cforest()`, a random subset of predictors is considered at each split<sup>2</sup> (the number of predictors is defined by `mtry`), and the variable with the strongest association – determined by the smallest p-value of the hypothesis test – is chosen for splitting (Hothorn and Zeileis, 2023). If no significant association is found, splitting stops and the node becomes a leaf node (Sieg et al., 2017). Hothorn et al. (2006) demonstrated that the CIT algorithm reduces the risk of overfitting by using statistical tests for variable selection and stopping criteria, enabling unbiased variable selection even when predictors differ in scale and splitting possibilities.

Early studies that used regression trees in flood damage modeling used the CART algorithm (Merz et al., 2013; Schröter et al., 2014), however, recent studies on flood damage modeling for companies recognized the value of CITs for datasets with variables that have different scales and splitting possibilities (Sieg et al., 2017; Sultana et al., 2018). Given that our dataset contains ordinal and continuous variables, we employed Random Forest models based on CIT. The Random Forest was created with R (version 4.4.2), a language and environment for statistical computing (R Core Team, 2024), using the `cforest()` function of the “partykit” package (version 1.2 – 20) (Hothorn and Zeileis, 2015). We trained an ensemble of 1,000 trees ( $n_{\text{tree}} = 1000$ ) and set the number of predictor variables that are randomly selected (or tried to find the best split) at each split (`mtry`) to one-third of the number of predictors, following standard practice (Hastie et al., 2009). When `mtry > 0`, a random selection of `mtry` input variables, is performed in each node (Hothorn and Zeileis, 2023). We use quantile regression forests, which provide probabilistic outputs rather than only a mean prediction (Meinshausen, 2006). The distribution of predictions of all trees in a Random Forest are considered in the calculation of the mean CRPS.

Fig. S4: Visualization of 10-fold CV and Random Forest (Figure adapted from Sieg et al., 2017)

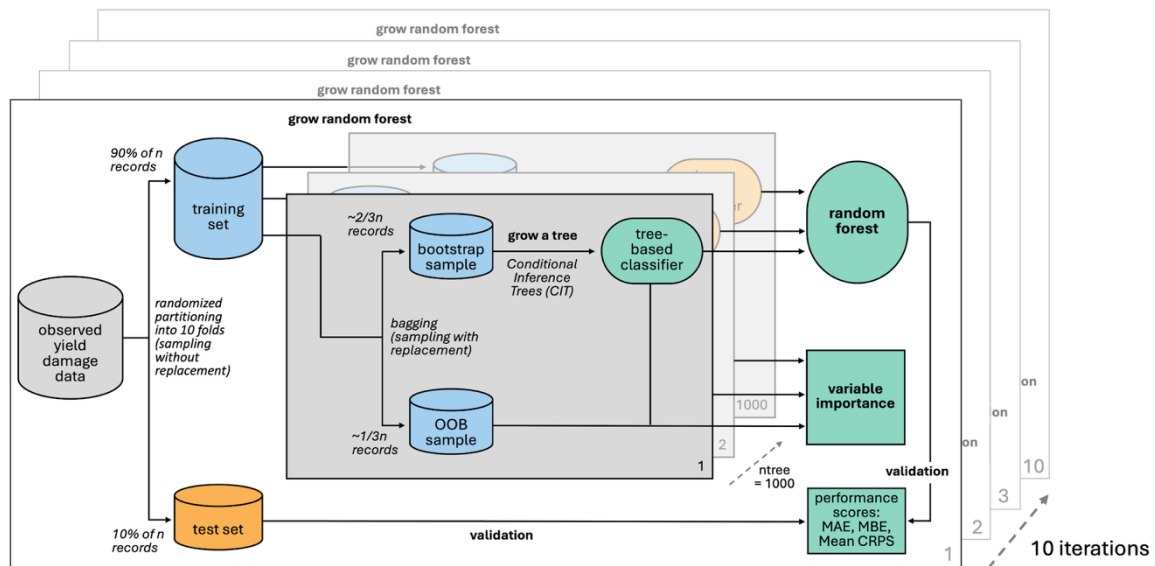

## 2.2 Bayesian Regression

### 2.2.1 Zero-and-one inflated beta regression

Bayesian data analysis is a method that derives a logic from data to provide a probability distribution of plausible answers to a question. The method uses probability theory to model things happening in the world or theoretical concepts like parameters. After defining a statistical model, Bayesian data analysis

<sup>2</sup> In a single CIT like `partykit::ctree()`, all predictors are considered at each node (Hothorn and Zeileis, 2023).

processes the data to generate inference. It is a tool to learn about something from the data that is not directly observable at first sight (McElreath, 2016).

We use Bayesian data analysis (for an introduction see Gelman et al., 2013; McElreath, 2016) to generate regression models to predict relative yield loss, with a zero-one-inflated-beta distribution and a logit link function. The logit link is the default for zero-one-inflated beta models (Bürkner, 2017a). Zero-one-inflated models are useful when the data contains many zeros (no loss) and ones (complete loss) that are not explained by the primary distribution of the response variable. The zero-one-inflated-beta distribution combines the beta distribution with a Bernoulli distribution to adequately model excess zeros and ones in the response variable (Ospina and Ferrari, 2010). The combined distribution has the following cumulative distribution function:

$$BEINF(y|\lambda, \gamma, \mu, \varphi) = \lambda \cdot F_{Bernoulli}(y|\gamma) + (1 - \lambda) \cdot F_{Beta}(y|\mu, \varphi), \quad (1)$$

with  $y$  being the response variable (the relative yield loss) and  $\lambda$  being the zero-one-inflation probability (e.g., the probability that the response is 0 or 1). The term  $F_{Bernoulli}(y|\gamma)$  describes the CDF of the Bernoulli distribution with the parameter  $\lambda$  being the conditional one-inflation probability (the probability that the response is 1 rather than 0). The reparameterized beta distribution  $F_{Beta}(y|\mu, \varphi)$  is defined by the mean ( $\mu$ ) and a precision parameter ( $\varphi$ ) (Ospina and Ferrari, 2010; Schoppa et al., 2020).

To train Bayesian multilevel models (MLMs), we utilized the brms package (version 2.22.0) in R (version 4.4.2). Utilizing the probabilistic programming language Stan for Bayesian inference on the backend, the brms package enables the fitting of MLM models through an lme4-like formula syntax. MLMs predict the response variable  $y$  “through the linear combination  $\eta$  of predictors transformed by the inverse link function  $f$ , assuming a certain distribution  $D$  for  $y$ ” (Bürkner, 2017b). The form of the MLM can be written as:

$$y \sim D(f(\eta_i), \theta). \quad (2)$$

In this formula,  $D$  is the ‘family,’  $f$  is the inverse link function,  $\eta$  is the combination of predictors, and  $i$  is the  $i$ -th data point. The parameter  $\theta$  describes family-specific parameters that are estimated, e.g. the standard deviation  $\sigma$  in normal models. A key advantage of Bayesian Markov chain Monte Carlo (MCMC) sampling approaches compared to maximum likelihood approaches is that the former treat uncertainty as a parameter, instead of assuming that it is part of the error term. Consequently, the Bayesian models allow to evaluate uncertainty in the estimates, as they provide a distribution of predictions.

Table S3 summarizes the parameters that are estimated in the regression model. The mathematical derivation of the flood damage model is:

$$y_i \sim ZOIB(\mu_i, \phi_i, zoi_i, coi_i), \quad (3)$$

where  $y_i \in [0,1]$ , relative yield loss for observation  $i$  (e.g., one rice field) is modeled as a share that can take on the values 0 (no loss) and 1 (complete loss) or values in between (partial loss) and where  $\mu$  (mu) is the mean of the beta distribution,  $\phi$  (phi) is the precision of the beta component,  $zoi_i$  is the probability that the relative yield loss is either 0 or 1, and  $coi_i$  is the conditional probability that  $y_i = 1$  given  $y_i \in \{0,1\}$ . The probability density function is (Ospina and Ferrari, 2010):

$$f(y_i) = \begin{cases} zoi_i \cdot (1 - coi_i), & \text{if } y_i = 0 \\ zoi_i \cdot coi_i, & \text{if } y_i = 1 \\ (1 - zoi_i) \cdot Beta(y_i; \mu_i, \phi_i), & \text{if } 0 < y_i < 1. \end{cases} \quad (4)$$

Table S3: Overview of parameters, their interpretation and used link functions for the zero-one-inflated beta distribution (Bürkner, 2017a)

| Parameter    | Description                                                                                                                                              | Interpretation                                                                                                 | Link function | Scale           |
|--------------|----------------------------------------------------------------------------------------------------------------------------------------------------------|----------------------------------------------------------------------------------------------------------------|---------------|-----------------|
| $\mu$ (mu)   | Mean of the beta distribution                                                                                                                            | A larger mu indicates a higher expected relative yield loss.                                                   | Logit         | $\mu \in (0,1)$ |
| $\Phi$ (phi) | Precision (controls variance)                                                                                                                            | A larger phi means less variance, indicating that the observations are more tightly clustered around the mean. | Log           | $\Phi > 0$      |
| zoi          | Captures the probability that the relative yield loss is exactly 0 or 1 (zero-one-inflation probability). It is the probability that $y_i \in \{0,1\}$ . | A higher zoi indicates a greater likelihood of observing the values zero or one.                               | Logit         | $zoi \in (0,1)$ |

|     |                                                                                                                                                                                                                                      |                                                                                                      |       |                 |
|-----|--------------------------------------------------------------------------------------------------------------------------------------------------------------------------------------------------------------------------------------|------------------------------------------------------------------------------------------------------|-------|-----------------|
| coi | Describes the probability that the relative yield loss is 1, given that the relative yield loss is either 0 or 1 (conditional one-inflation probability). It is the conditional probability that $y_i = 1$ given $y_i \in \{0,1\}$ . | A higher coi suggests that, among the zero and one observations, ones are more prevalent than zeros. | Logit | coi $\in (0,1)$ |
|-----|--------------------------------------------------------------------------------------------------------------------------------------------------------------------------------------------------------------------------------------|------------------------------------------------------------------------------------------------------|-------|-----------------|

In the following, we present the mathematical equations that build the foundation of the model. Each submodel uses linear predictors  $\eta$  that are transformed via a link function. Each linear predictor is modeled indirectly using a linear combination of predictors (including water depth, duration, and growth stage), and then transformed to ensure the result stays in the valid range, which is defined by the link function. For each submodel, the model computes a linear predictor  $\eta$ , which in general terms is denoted as

$$\eta = \beta_0 + \beta_1 x_1 + \beta_2 x_2 + \dots \quad (5)$$

where  $\beta_0$  is the intercept (the value of  $\eta$  when all predictors  $x_1, x_2$  etc. are zero), the regression coefficients  $\beta_1, \beta_2$  etc. (also called slopes or weights) quantify the effect of the independent variables  $x_1, x_2$  etc. on the linear predictor  $\eta$ , and where  $x_1, x_2$  etc. are the independent variables.

The linear predictor can take values from  $-\infty$  to  $+\infty$ , but it should be constrained. In the next step, a link function is applied to transform the linear predictor  $\eta$  to stay within the valid bounds.

1.  $\mu$  (mu), zoi, and coi can only take values in the range (0,1), hence, the logit link is used, which – for  $\mu$  as an example parameter – would be denoted as:

$$\text{logit}(\mu) = \eta = \beta_0 + \beta_1 x_1 + \beta_2 x_2 + \dots \quad (6)$$

To simulate and interpret predictions, we are interested in the value of the parameter, here,  $\mu$ , so we convert the formula back using the inverse logit function:

$$\mu = \text{logit}^{-1}(\eta) = \frac{1}{1+e^{-\eta}} \quad (7)$$

2. The parameter  $\Phi$  (phi) should be positive, therefore, the log link is used, with

$$\Phi = e^{\eta}. \quad (8)$$

To interpret or simulate predictions for  $\phi$ , we apply the inverse log function, which is

$$\Phi = \exp(\eta). \quad (9)$$

### 2.2.2 Bayesian multivariate regression model

We fit two types of Bayesian generalized nonlinear multivariate multilevel models: a univariate model (with water depth as a predictor) and a multivariate model (with water depth, flood duration, and growth stage as predictors). The multivariate regression model is presented in this subsection and the univariable model is introduced in the following subsection. To build that model, we estimate the precision of the beta component ( $\Phi$ ) and the zero-one-inflation probability based on all available predictors. In contrast, the mean of the beta distribution ( $\mu$ ) and the conditional one inflation probability are estimated by the most influential predictor variables to reduce overfitting and improve predictive performance. The linear predictors with link functions are as follows:

1. Mean of the beta component ( $\mu$ ):

$$\text{logit}(\mu_i) = \beta_0 + \beta_1 \cdot \text{water\_depth}_i + \beta_2 \cdot \text{duration}_i + \beta_3 \cdot \text{growth\_stage}_i \quad (10)$$

2. Precision of the beta component ( $\Phi$ ):

$$\log(\phi_i) = \gamma_0 + \gamma_1 \cdot \text{water\_depth}_i + \gamma_2 \cdot \text{duration}_i \quad (11)$$

3. Zero-one-inflation probability (zoi):

$$\text{logit}(\text{zoi}_i) = \delta_0 + \delta_1 \cdot \text{water\_depth}_i + \delta_2 \cdot \text{duration}_i + \delta_3 \cdot \text{growth\_stage}_i \quad (12)$$

4. Conditional one inflation probability (coi):

$$\text{logit}(\text{coi}_i) = \alpha_0 + \alpha_1 \cdot \text{water\_depth}_i + \alpha_2 \cdot \text{duration}_i \quad (13)$$

The R code to fit the model is as follows:

```
model_brm = brm(bf(loss_ratio ~ water_depth_cm + duration_days + growth_stage,
  phi ~ water_depth_cm + duration_days,
  zoi ~ water_depth_cm + duration_days + growth_stage,
  coi ~ water_depth_cm + duration_days),
  data = train_data,
  family = zero_one_inflated_beta("logit"),
  chains = 2, iter = 2000, warmup = 200,
  control = list(adapt_delta = 0.95)) \quad (14)
```

In the brms package, population-level parameters are not limited to have normal priors. For the population-level parameters, the default is that parameters have an improper flat prior over the reals. We used the default priors of the brms package, as no deviations occurred when using the priors and because the default priors can be vectorized which results in faster MCMC sampling (Bürkner, 2017b).

We selected the model (mod3) presented above based on a performance comparison of four multivariate regression model specifications (mod1, mod2, mod3, and mod4) with the following Bayesian model formulas:

mod1:  $\text{bf}(\text{loss\_ratio} \sim \text{water\_depth\_cm} + \text{duration\_days} + \text{growth\_stage},$  (15)  
 $\text{phi} \sim \text{water\_depth\_cm},$   
 $\text{zoi} \sim \text{water\_depth\_cm},$   
 $\text{coi} \sim \text{water\_depth\_cm})$

mod2:  $\text{bf}(\text{loss\_ratio} \sim \text{water\_depth\_cm} + \text{duration\_days} + \text{growth\_stage},$  (16)  
 $\text{phi} \sim \text{water\_depth\_cm} + \text{duration\_days},$   
 $\text{zoi} \sim \text{water\_depth\_cm} + \text{duration\_days},$   
 $\text{coi} \sim \text{water\_depth\_cm} + \text{duration\_days})$

mod3:  $\text{bf}(\text{loss\_ratio} \sim \text{water\_depth\_cm} + \text{duration\_days} + \text{growth\_stage},$  (17)  
 $\text{phi} \sim \text{water\_depth\_cm} + \text{duration\_days},$   
 $\text{zoi} \sim \text{water\_depth\_cm} + \text{duration\_days} + \text{growth\_stage},$   
 $\text{coi} \sim \text{water\_depth\_cm} + \text{duration\_days})$

mod4:  $\text{bf}(\text{loss\_ratio} \sim \text{water\_depth\_cm} + \text{duration\_days} + \text{growth\_stage},$  (18)  
 $\text{phi} \sim \text{water\_depth\_cm} + \text{duration\_days} + \text{growth\_stage},$   
 $\text{zoi} \sim \text{water\_depth\_cm} + \text{duration\_days} + \text{growth\_stage},$   
 $\text{coi} \sim \text{water\_depth\_cm} + \text{duration\_days} + \text{growth\_stage})$

In the model comparison, data, family, chains, iterations, warmup, and control were the same across models (as presented in formula 13, but with 1000 iterations). The compared model specifications are based on different assumptions:

- mod1 includes only water\_depth\_cm as a predictor in all submodels for parsimony, assuming that water depth is the primary driver of the relative yield loss.
- mod4 adds duration\_days to the phi, zoi, and coi submodels, assuming that duration adds explanatory power.
- mod6 further includes growth\_stage in the zoi submodel.
- mod\_all includes all three predictors (water\_depth\_cm, duration\_days, growth\_stage) in all submodels, representing the most complex specification.

Table S4 presents the results of the performance comparison. Based on expected log predictive density (ELPD) comparisons, mod2 significantly outperforms mod1, and mod3 significantly outperforms mod2, indicating that adding complexity to submodels beyond the most influential predictors may reduce predictive performance. The difference between mod3 and mod4 is not statistically significant, suggesting that fully parameterizing all components does not improve the model significantly. The results support a modeling approach in which complexity is allocated to components (like  $\Phi$  and zoi) where it demonstrably improves model fit, while more parsimonious specifications are used for parameters like  $\mu$  and coi.

*Table S4: Comparison of multiple Bayesian Regression Models, based on the expected log predictive density (ELPD) and the standard error of ELPD. The table presents the metrics for two probabilistic stage-damage functions (SDF-prob) and four multivariate regression models (mod1 to mod4). Based on the comparison, SDF-prob-1 and mod3 were selected for the analysis.*

| Comparison               | Compared model | Difference in ELPD | Standard Error of ELPD | Better performing model | Does the model perform significantly better? |
|--------------------------|----------------|--------------------|------------------------|-------------------------|----------------------------------------------|
| SDF-prob-1 vs SDF-prob-2 | SDF-prob-2     | -7.9               | 1.9                    | SDF (prob) 1            | Yes                                          |
| mod1 vs SDF-prob-1       | SDF-prob-1     | -15.7              | 4.8                    | mod1                    | Yes                                          |
| mod2 vs mod1             | mod1           | -16.9              | 6.3                    | mod2                    | Yes                                          |
| mod3 vs mod2             | mod2           | -20.3              | 6.6                    | mod3                    | Yes                                          |
| mod4 vs mod3             | mod4           | -2.4               | 1.6                    | mod3                    | No                                           |

### 2.3 Stage-damage functions

We compare the multivariable models introduced above to univariable stage-damage functions (SDF), which predict flood-induced loss based on water depth. The SDF constitute a standard approach in flood loss modeling (Merz et al., 2010). We use a deterministic and a probabilistic version of the SDF for the evaluation of the performance improvement of multivariable and probabilistic models separately.

In line with previous studies on flood-induced asset loss (Schoppa et al., 2020; Schröter et al., 2014; Wagenaar et al., 2017), we use a square root SDF, which has outperformed linear and polynomial forms previously (Elmer et al., 2010). The deterministic SDF is a simple, least square regression, where the relative yield loss is defined as:

$$\text{relative yield loss} = \alpha + \beta \sqrt{\text{water depth}} + \varepsilon \quad (19)$$

where relative yield loss is the observed loss ratio,  $\alpha$  the intercept,  $\beta$  the regression coefficient, and  $\varepsilon$  is the error. In the model fitting process, values of  $\alpha$  and  $\beta$  are identified that lead to the smallest error sum of squares (ESS), calculated as:

$$ESS = \sum_{i=1}^n (\text{relative yield loss}_i - \widehat{\text{relative yield loss}}_i)^2 \quad (20)$$

where the difference of the observed and modeled relative loss (  $\text{relative yield loss}_i - \widehat{\text{relative yield loss}}_i$  ) describes the error.

The probabilistic SDF is a Bayesian regression, where the relative yield loss is defined as:

$$\text{loss ratio} \sim \text{BEINF}(\lambda, \gamma, \mu_i, \phi) \quad (21)$$

$$\text{logit}(\mu_i) = \alpha + \beta \sqrt{\text{water depth}_i} \quad (22)$$

The relative yield loss is bounded to 0% to 100% and yield loss starts to occur at a water depth of 2 cm. We compared the performance of two forms of the Bayesian regression and found that the probabilistic SDF (SDF-prob-1) outperformed the probabilistic square root SDF (SDF-prob-2) (Table S4). The models were defined as follows, with the same Bayesian regression specifications as used for the BRM model comparison:

$$\begin{aligned} \text{SDF-prob-1: } & \text{bf}(\text{loss\_ratio} \sim \text{water\_depth\_cm}, \\ & \quad \text{phi} \sim \text{water\_depth\_cm}, \\ & \quad \text{zoi} \sim \text{water\_depth\_cm}, \\ & \quad \text{coi} \sim \text{water\_depth\_cm}), \end{aligned} \quad (23)$$

$$\begin{aligned} \text{SDF-prob-2: } & \text{bf}(\text{loss\_ratio} \sim \sqrt{\text{water\_depth\_cm}}, \\ & \quad \text{phi} \sim \text{water\_depth\_cm}, \\ & \quad \text{zoi} \sim \text{water\_depth\_cm}, \\ & \quad \text{coi} \sim \text{water\_depth\_cm}), \end{aligned} \quad (24)$$

### 2.4 Ramp functions by Shrestha et al. (2021)

The models described above were compared with status quo reference functions from the literature. The selected reference functions are ramp functions developed for Myanmar by Shrestha et al. (2021) (Fig. S5). Separate functions exist for three growth stages and six flood durations, leading to a total of 18 functions. Yield loss starts to occur at the minimum damageable flood depth ( $h_{\min}$ ); it increases linearly up to the water depth where the plant is fully underwater (the starting level of complete submergence or SLCS). Depending on growth stage and flood duration, the maximum relative yield loss (yield loss<sub>max</sub>) varies. The ramp functions are based on empirical data for Myanmar (Shrestha et al., 2021).

Fig. S5: Flood damage model for rice in Myanmar based on ramp functions (Figure adapted from Shrestha et al., 2021)

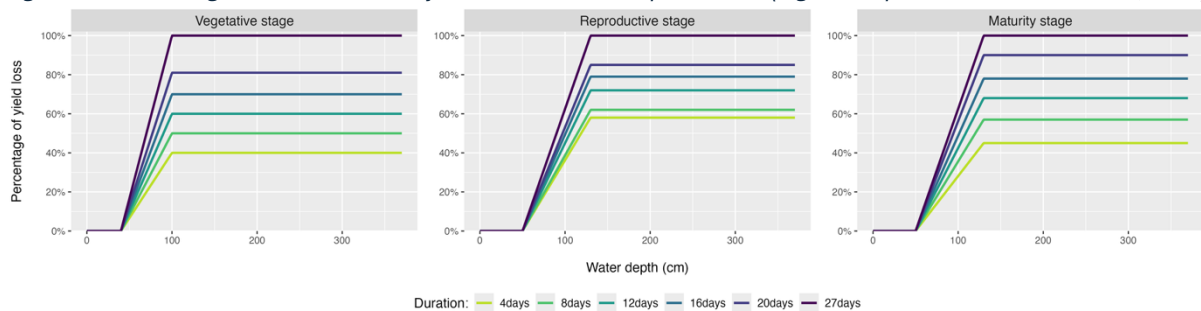

### 3 Model validation

We assess the model performance of each model, using k-fold cross-validation (CV), with k=10. For the 10-fold CV, we randomly split the observed rice yield loss data into ten folds of roughly the same size. Each fold serves as a validation set for a model that is fitted with the remaining observations in the training set (James et al., 2013). The model's overall performance score is the mean of the ten folds. As part of the cross-region validation, we assessed the performance of the localized models across regions. In addition, we tested the performance of the generalized models in each region as part of the LOO CV.

Each model's performance is validated by calculating three performance metrics:

1. the mean absolute error (MAE), which indicates the accuracy of a predicted value by averaging the difference between the observation and the estimate across all observations in the validation set. The MAE is the sum of absolute errors, defined as the absolute difference between the observed and estimated values, divided by the size of the validation set (n),

$$MAE = \frac{1}{n} \sum_{i=1}^n |obs - pred|, \quad (25)$$

2. the mean bias error (MBE), measuring the mean bias in the model's predictions and evaluates whether the model tends to under- or overestimate the observed values. A negative MBE means that the model is overpredicting, a positive MBE means that the model is underpredicting, and zero indicates no bias:

$$MBE = \frac{1}{n} \sum_{i=1}^n obs - pred, \text{ and} \quad (26)$$

3. the continuous ranked probability score (CRPS), which is a scoring metric to evaluate the performance of probabilistic models that provide a distribution of predictions. Hence, the CRPS does not evaluate a point estimate, but it evaluates the full distribution of predictions by jointly considering its sharpness (the concentration of the predictive distribution) and calibration (the statistical agreement of observations and model predictions). The CRPS is a metric that enables a direct comparison of point predictions and probabilistic predictions, as it generalizes the MAE (Gneiting and Katzfuss, 2014; Matheson and Winkler, 1976). The CRPS for a given observation  $obs_i$  is defined as:

$$CRPS_i(F_i, obs_i) = \int_{-\infty}^{\infty} (F_i(x) - 1\{obs_i \leq x\})^2 dx, \quad (27)$$

where  $F_i$  is the cumulative density of the predictive distribution  $f_i(x)$  and  $1\{obs \leq x\}$  is the indicator function, which is one if  $obs \leq x$  and zero otherwise. The calculation of the CRPS for predictive distributions generated by the probabilistic models, see Jordan et al. (2019) and Krüger et al. (2021). As the relative loss is limited to values in the range [0, 1], CRPS values are within the same interval, with lower values indicating better model performance. One CRPS is calculated per observation in the validation set. For each fold, one mean CRPS is calculated. The overall model performance score is the mean of the mean CRPS. The performance scores selected for the model evaluation are aligned with previous assessments of flood damage model performance (Schoppa et al., 2020).

## 4 Supplementary results

### 4.1 Rice damage models in the literature

Table S5 presents an inventory of the identified flood damage models.

Table S5: Overview of flood damage models and data in the literature. The table presents details on the country, methodology, variables, rice variety, equation, model validation and model transferability assessment.

| Reference                             | Country    | Methodology  | Response variable                                  | Water depth                                              | Duration       | Growth stage                         | Others                                                                                                                         | Rice variety      | Equation                                                                                                                                                                                                                                                                                                                                                                                                                                                                                                                                                                                         | Model validation                   | Transferability assessment                                             | Model type    |
|---------------------------------------|------------|--------------|----------------------------------------------------|----------------------------------------------------------|----------------|--------------------------------------|--------------------------------------------------------------------------------------------------------------------------------|-------------------|--------------------------------------------------------------------------------------------------------------------------------------------------------------------------------------------------------------------------------------------------------------------------------------------------------------------------------------------------------------------------------------------------------------------------------------------------------------------------------------------------------------------------------------------------------------------------------------------------|------------------------------------|------------------------------------------------------------------------|---------------|
| Hussain (1995)                        | Bangladesh | Expert-based | Yield reduction (in %)                             | Indirectly, as percentage of plant submerged (3 classes) | Yes (4 values) | Yes (6 classes)                      | Turbidity                                                                                                                      | BR3, B11, and B14 | Equation was not reported, but lookup tables for three plant submergence classes were provided.                                                                                                                                                                                                                                                                                                                                                                                                                                                                                                  | No                                 | No (but lookup tables for Japan, Korea, and IR-30 rice are shown)      | Deterministic |
| Intarathaiwong and Vudhivanich (1996) | Thailand   | Experimental | Yield reduction (in %)                             | Yes (5 values)                                           | Yes (4 values) | No (1 value: 45 days after planting) | No                                                                                                                             | RD 23             | Ramp functions for different flood durations; equation was not reported.                                                                                                                                                                                                                                                                                                                                                                                                                                                                                                                         | No                                 | No (but lookup tables for Japan, Korea, and the Philippines are shown) | Deterministic |
| Dutta et al. (2003)                   | Japan      | Empirical    | Damage (in %)                                      | Yes (3 classes)                                          | Yes (8 values) | No                                   | No                                                                                                                             | Not reported      | Polynomial:<br>$AD(i, j) = \sum_{k=1}^n [D_m(i, j, k) CRP_a(i, j, k) mn(k)]$ and $D_m = CP_k Y_k DC_k(i, j)$ , where<br>k = crop type k at any grid (i, j),<br>AD = the total agricultural damage to crops, $D_m$ = damage to crop per unit area (damage as a share of normal gross returns),<br>$CRP_a$ = total area of cultivation of crop type k, $mn$ = loss factor for crop type k depending on the time period in a year,<br>$CP_k$ = estimated cost p. unit weight of crop;<br>$Y_k$ = normal year yield per unit area, and<br>$DC_k$ = stage-damage function for crop type k (p. 29-30). | No                                 | No                                                                     | Deterministic |
| Kotera and Nawata (2007)              | Vietnam    | Experimental | Yield loss (percentage of unsubmerged plant yield) | Indirectly, as percentage of plant submerged (2 classes) | Yes (3 values) | Yes (6 classes)                      | Relative threshold depth for yield loss for the plant height (RTD) per growth stage; starting date of water inflow (10 values) | CR203             | Weibull function: $YL = 1 - \exp\{-\rho * DSUB^x\}$ , where<br>YL (%) = relative yield loss compared to non-submerged plants,<br>$\rho$ = sensitivity to yield loss given by a specific growth stage and depth of submergence,<br>DSUB (days) = duration of effective submergence for yield loss, and<br>x = a constant accounting for characteristics of yield loss increments to DSUB given to the plants with effective submergence at the vegetative and the reproductive phases.                                                                                                            | Yes ( $R^2$ is presented on p. 52) | No                                                                     | Deterministic |

| Reference                                  | Country                   | Methodology               | Response variable        | Water depth              | Duration       | Growth stage | Others                            | Rice variety                           | Equation                                                                                                                                                                                                                                                                                                                                                                                                                                                                                                                                                                                                                                                                                                                                                                                                                                                                                                                                                                                                                                                                                                                                                                                                                                                                                                                                                                                                                                                                                                                                                                                                                                                                                                                                  | Model validation | Transferability assessment | Model type                |                          |                          |   |    |                   |        |     |     |     |     |      |                   |        |     |     |     |     |      |                   |        |      |     |     |               |     |                    |         |     |     |     |     |      |                    |        |     |     |     |    |     |                    |        |     |     |     |    |     |    |    |               |
|--------------------------------------------|---------------------------|---------------------------|--------------------------|--------------------------|----------------|--------------|-----------------------------------|----------------------------------------|-------------------------------------------------------------------------------------------------------------------------------------------------------------------------------------------------------------------------------------------------------------------------------------------------------------------------------------------------------------------------------------------------------------------------------------------------------------------------------------------------------------------------------------------------------------------------------------------------------------------------------------------------------------------------------------------------------------------------------------------------------------------------------------------------------------------------------------------------------------------------------------------------------------------------------------------------------------------------------------------------------------------------------------------------------------------------------------------------------------------------------------------------------------------------------------------------------------------------------------------------------------------------------------------------------------------------------------------------------------------------------------------------------------------------------------------------------------------------------------------------------------------------------------------------------------------------------------------------------------------------------------------------------------------------------------------------------------------------------------------|------------------|----------------------------|---------------------------|--------------------------|--------------------------|---|----|-------------------|--------|-----|-----|-----|-----|------|-------------------|--------|-----|-----|-----|-----|------|-------------------|--------|------|-----|-----|---------------|-----|--------------------|---------|-----|-----|-----|-----|------|--------------------|--------|-----|-----|-----|----|-----|--------------------|--------|-----|-----|-----|----|-----|----|----|---------------|
| Mekong River Commission Secretariat (2009) | Cambodia                  | Expert-based              | Damage (USD/ha)          | Yes                      | No             | No           | Rice variety; Timing of the flood | Early flood paddy & rainy season paddy | <p>Ramp functions for different rice varieties and timings of the flood; equation was not reported, but can be approximated by:</p> $D = \begin{cases} 0 & \text{if } wd < 1.0 \\ m * wd - b & \text{if } 1.0 < wd < SLCS \\ 1, & \text{if } wd > SLCS \end{cases}$ <p>where D = damage in USD/ha for a specific rice variety and timing of flood, with m = slope and b= intercept.</p> <p>When timing of flood = June 1, the slope is:</p> $m = \left( \frac{D_{max}}{SLCS - h_{min}} \right) = \frac{390}{3.5 - 1} = \frac{390}{2.5} = 156$ <p>where D<sub>max</sub> = the duration-specific maximum damage (in USD/ha), SLCS = the starting level of complete submergence (in meter), and h<sub>min</sub> = minimum damageable flood depth (in meter). The intercept b is calculated based on y=mx+b and point P(1 0):</p> <p>b = y – mx = 0 – 156 * 1 = –156.</p> <table><tr><th>Rice variety</th><th>Flood timing</th><th>D<sub>max</sub> (USD/ha)</th><th>SLCS (meter)</th><th>h<sub>min</sub> (meter)</th><th>m</th><th>b</th></tr><tr><td>Early flood paddy</td><td>June 1</td><td>675</td><td>3.5</td><td>1.0</td><td>270</td><td>–270</td></tr><tr><td>Early flood paddy</td><td>July 1</td><td>275</td><td>3.5</td><td>1.0</td><td>110</td><td>–110</td></tr><tr><td>Early flood paddy</td><td>Aug. 1</td><td>25</td><td>3.5</td><td>1.0</td><td>10</td><td>–10</td></tr><tr><td>Rainy season paddy</td><td>Sept. 1</td><td>390</td><td>3.5</td><td>1.0</td><td>156</td><td>–156</td></tr><tr><td>Rainy season paddy</td><td>Oct. 1</td><td>195</td><td>3.5</td><td>1.0</td><td>78</td><td>–78</td></tr><tr><td>Rainy season paddy</td><td>Nov. 1</td><td>195</td><td>3.5</td><td>1.0</td><td>78</td><td>–78</td></tr></table> | Rice variety     | Flood timing               | D <sub>max</sub> (USD/ha) | SLCS (meter)             | h <sub>min</sub> (meter) | m | b  | Early flood paddy | June 1 | 675 | 3.5 | 1.0 | 270 | –270 | Early flood paddy | July 1 | 275 | 3.5 | 1.0 | 110 | –110 | Early flood paddy | Aug. 1 | 25   | 3.5 | 1.0 | 10            | –10 | Rainy season paddy | Sept. 1 | 390 | 3.5 | 1.0 | 156 | –156 | Rainy season paddy | Oct. 1 | 195 | 3.5 | 1.0 | 78 | –78 | Rainy season paddy | Nov. 1 | 195 | 3.5 | 1.0 | 78 | –78 | No | No | Deterministic |
| Rice variety                               | Flood timing              | D <sub>max</sub> (USD/ha) | SLCS (meter)             | h <sub>min</sub> (meter) | m              | b            |                                   |                                        |                                                                                                                                                                                                                                                                                                                                                                                                                                                                                                                                                                                                                                                                                                                                                                                                                                                                                                                                                                                                                                                                                                                                                                                                                                                                                                                                                                                                                                                                                                                                                                                                                                                                                                                                           |                  |                            |                           |                          |                          |   |    |                   |        |     |     |     |     |      |                   |        |     |     |     |     |      |                   |        |      |     |     |               |     |                    |         |     |     |     |     |      |                    |        |     |     |     |    |     |                    |        |     |     |     |    |     |    |    |               |
| Early flood paddy                          | June 1                    | 675                       | 3.5                      | 1.0                      | 270            | –270         |                                   |                                        |                                                                                                                                                                                                                                                                                                                                                                                                                                                                                                                                                                                                                                                                                                                                                                                                                                                                                                                                                                                                                                                                                                                                                                                                                                                                                                                                                                                                                                                                                                                                                                                                                                                                                                                                           |                  |                            |                           |                          |                          |   |    |                   |        |     |     |     |     |      |                   |        |     |     |     |     |      |                   |        |      |     |     |               |     |                    |         |     |     |     |     |      |                    |        |     |     |     |    |     |                    |        |     |     |     |    |     |    |    |               |
| Early flood paddy                          | July 1                    | 275                       | 3.5                      | 1.0                      | 110            | –110         |                                   |                                        |                                                                                                                                                                                                                                                                                                                                                                                                                                                                                                                                                                                                                                                                                                                                                                                                                                                                                                                                                                                                                                                                                                                                                                                                                                                                                                                                                                                                                                                                                                                                                                                                                                                                                                                                           |                  |                            |                           |                          |                          |   |    |                   |        |     |     |     |     |      |                   |        |     |     |     |     |      |                   |        |      |     |     |               |     |                    |         |     |     |     |     |      |                    |        |     |     |     |    |     |                    |        |     |     |     |    |     |    |    |               |
| Early flood paddy                          | Aug. 1                    | 25                        | 3.5                      | 1.0                      | 10             | –10          |                                   |                                        |                                                                                                                                                                                                                                                                                                                                                                                                                                                                                                                                                                                                                                                                                                                                                                                                                                                                                                                                                                                                                                                                                                                                                                                                                                                                                                                                                                                                                                                                                                                                                                                                                                                                                                                                           |                  |                            |                           |                          |                          |   |    |                   |        |     |     |     |     |      |                   |        |     |     |     |     |      |                   |        |      |     |     |               |     |                    |         |     |     |     |     |      |                    |        |     |     |     |    |     |                    |        |     |     |     |    |     |    |    |               |
| Rainy season paddy                         | Sept. 1                   | 390                       | 3.5                      | 1.0                      | 156            | –156         |                                   |                                        |                                                                                                                                                                                                                                                                                                                                                                                                                                                                                                                                                                                                                                                                                                                                                                                                                                                                                                                                                                                                                                                                                                                                                                                                                                                                                                                                                                                                                                                                                                                                                                                                                                                                                                                                           |                  |                            |                           |                          |                          |   |    |                   |        |     |     |     |     |      |                   |        |     |     |     |     |      |                   |        |      |     |     |               |     |                    |         |     |     |     |     |      |                    |        |     |     |     |    |     |                    |        |     |     |     |    |     |    |    |               |
| Rainy season paddy                         | Oct. 1                    | 195                       | 3.5                      | 1.0                      | 78             | –78          |                                   |                                        |                                                                                                                                                                                                                                                                                                                                                                                                                                                                                                                                                                                                                                                                                                                                                                                                                                                                                                                                                                                                                                                                                                                                                                                                                                                                                                                                                                                                                                                                                                                                                                                                                                                                                                                                           |                  |                            |                           |                          |                          |   |    |                   |        |     |     |     |     |      |                   |        |     |     |     |     |      |                   |        |      |     |     |               |     |                    |         |     |     |     |     |      |                    |        |     |     |     |    |     |                    |        |     |     |     |    |     |    |    |               |
| Rainy season paddy                         | Nov. 1                    | 195                       | 3.5                      | 1.0                      | 78             | –78          |                                   |                                        |                                                                                                                                                                                                                                                                                                                                                                                                                                                                                                                                                                                                                                                                                                                                                                                                                                                                                                                                                                                                                                                                                                                                                                                                                                                                                                                                                                                                                                                                                                                                                                                                                                                                                                                                           |                  |                            |                           |                          |                          |   |    |                   |        |     |     |     |     |      |                   |        |     |     |     |     |      |                   |        |      |     |     |               |     |                    |         |     |     |     |     |      |                    |        |     |     |     |    |     |                    |        |     |     |     |    |     |    |    |               |
| Mekong River Commission Secretariat (2009) | Lao PDR                   | Expert-based              | Damage (USD/ha)          | Yes                      | Yes (3 values) | No           | No                                | Not reported                           | <p>Ramp functions for different flood durations; equation was not reported, but can be approximated by:</p> $D = \begin{cases} 0 & \text{if } wd < 0.5 \\ m * wd - b & \text{if } 0.5 < wd < SLCS \\ 1, & \text{if } wd > SLCS \end{cases}$ <p>where D = damage in USD/ha for a specific water depth (wd) in meter, with m = slope and b= intercept.</p> <p>When duration = 10 days, the slope is:</p> $m = \left( \frac{D_{max}}{SLCS - h_{min}} \right) = \frac{100}{3 - 0.5} = \frac{100}{2.5} = 40$ <p>where D<sub>max</sub> = the duration-specific maximum damage (in USD/ha), SLCS = the starting level of complete submergence (in meter), and h<sub>min</sub> = minimum damageable flood depth (in meter). The intercept b is calculated based on y=mx+b and point P(0.5 0):</p> <p>b = y – mx = 0 – 40 * 0.5 = –20.</p> <table><tr><th>Duration (days)</th><th>D<sub>max</sub> (USD/ha)</th><th>SLCS (meter)</th><th>h<sub>min</sub> (meter)</th><th>m</th><th>b</th></tr><tr><td>10</td><td>100</td><td>3.0</td><td>0.5</td><td>40</td><td>–20</td></tr><tr><td>15</td><td>400</td><td>3.0</td><td>0.5</td><td>160</td><td>–80</td></tr><tr><td>&gt;30</td><td>670</td><td>3.0</td><td>0.5</td><td>268</td><td>–134</td></tr></table>                                                                                                                                                                                                                                                                                                                                                                                                                                                                                          | Duration (days)  | D <sub>max</sub> (USD/ha)  | SLCS (meter)              | h <sub>min</sub> (meter) | m                        | b | 10 | 100               | 3.0    | 0.5 | 40  | –20 | 15  | 400  | 3.0               | 0.5    | 160 | –80 | >30 | 670 | 3.0  | 0.5               | 268    | –134 | No  | No  | Deterministic |     |                    |         |     |     |     |     |      |                    |        |     |     |     |    |     |                    |        |     |     |     |    |     |    |    |               |
| Duration (days)                            | D <sub>max</sub> (USD/ha) | SLCS (meter)              | h <sub>min</sub> (meter) | m                        | b              |              |                                   |                                        |                                                                                                                                                                                                                                                                                                                                                                                                                                                                                                                                                                                                                                                                                                                                                                                                                                                                                                                                                                                                                                                                                                                                                                                                                                                                                                                                                                                                                                                                                                                                                                                                                                                                                                                                           |                  |                            |                           |                          |                          |   |    |                   |        |     |     |     |     |      |                   |        |     |     |     |     |      |                   |        |      |     |     |               |     |                    |         |     |     |     |     |      |                    |        |     |     |     |    |     |                    |        |     |     |     |    |     |    |    |               |
| 10                                         | 100                       | 3.0                       | 0.5                      | 40                       | –20            |              |                                   |                                        |                                                                                                                                                                                                                                                                                                                                                                                                                                                                                                                                                                                                                                                                                                                                                                                                                                                                                                                                                                                                                                                                                                                                                                                                                                                                                                                                                                                                                                                                                                                                                                                                                                                                                                                                           |                  |                            |                           |                          |                          |   |    |                   |        |     |     |     |     |      |                   |        |     |     |     |     |      |                   |        |      |     |     |               |     |                    |         |     |     |     |     |      |                    |        |     |     |     |    |     |                    |        |     |     |     |    |     |    |    |               |
| 15                                         | 400                       | 3.0                       | 0.5                      | 160                      | –80            |              |                                   |                                        |                                                                                                                                                                                                                                                                                                                                                                                                                                                                                                                                                                                                                                                                                                                                                                                                                                                                                                                                                                                                                                                                                                                                                                                                                                                                                                                                                                                                                                                                                                                                                                                                                                                                                                                                           |                  |                            |                           |                          |                          |   |    |                   |        |     |     |     |     |      |                   |        |     |     |     |     |      |                   |        |      |     |     |               |     |                    |         |     |     |     |     |      |                    |        |     |     |     |    |     |                    |        |     |     |     |    |     |    |    |               |
| >30                                        | 670                       | 3.0                       | 0.5                      | 268                      | –134           |              |                                   |                                        |                                                                                                                                                                                                                                                                                                                                                                                                                                                                                                                                                                                                                                                                                                                                                                                                                                                                                                                                                                                                                                                                                                                                                                                                                                                                                                                                                                                                                                                                                                                                                                                                                                                                                                                                           |                  |                            |                           |                          |                          |   |    |                   |        |     |     |     |     |      |                   |        |     |     |     |     |      |                   |        |      |     |     |               |     |                    |         |     |     |     |     |      |                    |        |     |     |     |    |     |                    |        |     |     |     |    |     |    |    |               |

| Reference                                  | Country                   | Methodology  | Response variable                                                     | Water depth       | Duration       | Growth stage             | Others                                                                   | Rice variety                                                                      | Equation                                                                                                                                                                                                                                                                                                                                                                                                                                                                                                                                                                                                                                                                                                                                                                                                                                                                                                                                                                                                                                                                                                                                                                                                                                                      | Model validation                            | Transferability assessment | Model type    |                          |   |   |   |    |     |     |    |     |   |    |     |     |    |       |    |    |     |     |    |       |    |     |     |     |     |     |    |    |               |
|--------------------------------------------|---------------------------|--------------|-----------------------------------------------------------------------|-------------------|----------------|--------------------------|--------------------------------------------------------------------------|-----------------------------------------------------------------------------------|---------------------------------------------------------------------------------------------------------------------------------------------------------------------------------------------------------------------------------------------------------------------------------------------------------------------------------------------------------------------------------------------------------------------------------------------------------------------------------------------------------------------------------------------------------------------------------------------------------------------------------------------------------------------------------------------------------------------------------------------------------------------------------------------------------------------------------------------------------------------------------------------------------------------------------------------------------------------------------------------------------------------------------------------------------------------------------------------------------------------------------------------------------------------------------------------------------------------------------------------------------------|---------------------------------------------|----------------------------|---------------|--------------------------|---|---|---|----|-----|-----|----|-----|---|----|-----|-----|----|-------|----|----|-----|-----|----|-------|----|-----|-----|-----|-----|-----|----|----|---------------|
| Mekong River Commission Secretariat (2009) | Thailand                  | Expert-based | Relative damage (in %)                                                | Yes               | Yes (4 values) | No                       | No                                                                       | Not reported                                                                      | <p>Ramp functions for different flood durations; equation was not reported, but can be approximated by:</p> $LR = \begin{cases} 0 & \text{if } wd < 0.5 \\ m * wd - b & \text{if } 0.5 < wd < SLCS \\ 1, & \text{if } wd > SLCS \end{cases}$ <p>where LR = loss ratio (in %), m = slope and b= intercept.</p> <p>When duration = 7 days, the slope is:</p> $m = \left( \frac{LR_{max}}{SLCS - h_{min}} \right) = \frac{40}{1.5 - 0.5} = \frac{40}{1} = 40$ <p>where LR<sub>max</sub> = the duration-specific maximum loss ratio, SLCS = the starting level of complete submergence (in meter), and h<sub>min</sub> = minimum damageable flood depth (in meter). The intercept b is calculated based on y=mx+b and point P(0.5 0): b = y – mx = 0 – 40 * 0.5 = –20.</p> <table><tr><th>Duration (days)</th><th>D<sub>max</sub> (USD/ha)</th><th>SLCS (meter)</th><th>h<sub>min</sub> (meter)</th><th>m</th><th>b</th></tr><tr><td>7</td><td>40</td><td>1.5</td><td>0.5</td><td>40</td><td>-20</td></tr><tr><td>9</td><td>65</td><td>1.5</td><td>0.5</td><td>65</td><td>-32.5</td></tr><tr><td>11</td><td>85</td><td>1.5</td><td>0.5</td><td>85</td><td>-42.5</td></tr><tr><td>13</td><td>100</td><td>1.5</td><td>0.5</td><td>100</td><td>-50</td></tr></table> | Duration (days)                             | D <sub>max</sub> (USD/ha)  | SLCS (meter)  | h <sub>min</sub> (meter) | m | b | 7 | 40 | 1.5 | 0.5 | 40 | -20 | 9 | 65 | 1.5 | 0.5 | 65 | -32.5 | 11 | 85 | 1.5 | 0.5 | 85 | -42.5 | 13 | 100 | 1.5 | 0.5 | 100 | -50 | No | No | Deterministic |
| Duration (days)                            | D <sub>max</sub> (USD/ha) | SLCS (meter) | h <sub>min</sub> (meter)                                              | m                 | b              |                          |                                                                          |                                                                                   |                                                                                                                                                                                                                                                                                                                                                                                                                                                                                                                                                                                                                                                                                                                                                                                                                                                                                                                                                                                                                                                                                                                                                                                                                                                               |                                             |                            |               |                          |   |   |   |    |     |     |    |     |   |    |     |     |    |       |    |    |     |     |    |       |    |     |     |     |     |     |    |    |               |
| 7                                          | 40                        | 1.5          | 0.5                                                                   | 40                | -20            |                          |                                                                          |                                                                                   |                                                                                                                                                                                                                                                                                                                                                                                                                                                                                                                                                                                                                                                                                                                                                                                                                                                                                                                                                                                                                                                                                                                                                                                                                                                               |                                             |                            |               |                          |   |   |   |    |     |     |    |     |   |    |     |     |    |       |    |    |     |     |    |       |    |     |     |     |     |     |    |    |               |
| 9                                          | 65                        | 1.5          | 0.5                                                                   | 65                | -32.5          |                          |                                                                          |                                                                                   |                                                                                                                                                                                                                                                                                                                                                                                                                                                                                                                                                                                                                                                                                                                                                                                                                                                                                                                                                                                                                                                                                                                                                                                                                                                               |                                             |                            |               |                          |   |   |   |    |     |     |    |     |   |    |     |     |    |       |    |    |     |     |    |       |    |     |     |     |     |     |    |    |               |
| 11                                         | 85                        | 1.5          | 0.5                                                                   | 85                | -42.5          |                          |                                                                          |                                                                                   |                                                                                                                                                                                                                                                                                                                                                                                                                                                                                                                                                                                                                                                                                                                                                                                                                                                                                                                                                                                                                                                                                                                                                                                                                                                               |                                             |                            |               |                          |   |   |   |    |     |     |    |     |   |    |     |     |    |       |    |    |     |     |    |       |    |     |     |     |     |     |    |    |               |
| 13                                         | 100                       | 1.5          | 0.5                                                                   | 100               | -50            |                          |                                                                          |                                                                                   |                                                                                                                                                                                                                                                                                                                                                                                                                                                                                                                                                                                                                                                                                                                                                                                                                                                                                                                                                                                                                                                                                                                                                                                                                                                               |                                             |                            |               |                          |   |   |   |    |     |     |    |     |   |    |     |     |    |       |    |    |     |     |    |       |    |     |     |     |     |     |    |    |               |
| Ganji et al. (2012)                        | Iran                      | Experimental | Loss rate (L) = “ratio of the number of damaged stems to total stems” | Yes (up to 0.45m) | No             | Yes (4 classes)          | Velocity, shear stress, Froude number, Reynolds number [separate models] | Not reported                                                                      | <p>Linear function, logarithmic function, quadratic function for different growth stages;</p> $L = a * \ln(Re) + b$ , where<br><br>L = crop loss magnitude in percent and<br>a and b = regression coefficients determined by experiment for different growth stages (given in Table 3, on p. 418).                                                                                                                                                                                                                                                                                                                                                                                                                                                                                                                                                                                                                                                                                                                                                                                                                                                                                                                                                            | Yes (R <sup>2</sup> is presented on p. 417) | No                         | Deterministic |                          |   |   |   |    |     |     |    |     |   |    |     |     |    |       |    |    |     |     |    |       |    |     |     |     |     |     |    |    |               |
| Chau et al. (2015)                         | Vietnam                   | Empirical    | Total damage (in VDN billion in 2010 prices) and susceptibility       | Yes (4 classes)   | No             | Indirectly (3 scenarios) | No                                                                       | Winter-spring rice, summer-autumn rice (only considered in cost-benefit-analysis) | <p>The damage function by Messner et al. (2007) was used:</p> $Damage_{total} = \sum_{i=1}^n \sum_{j=1}^m D_{i,j}$ $= \sum_{i=1}^n \sum_{j=1}^m value_{i,j} \times susceptibility_{i,j}$ where<br><br>i = category of crops (with n crop types);<br>j = inundation depth (with m inundation classes);<br>D <sub>ij</sub> = damage for crop i at inundation depth j;<br>value <sub>ij</sub> = yield per ha for crop i (based on previous year) * inundated area (at depth j) * crop sale price;<br>susceptibility <sub>ij</sub> = f(E <sub>ij</sub> , F <sub>k</sub> ) measured as percentage of crop yield (e.g. for rice) in flood year compared to crop yield in previous year (based on historical yield statistics; average yield loss per district and per inundation level was calculated);<br>F <sub>k</sub> = inundation characteristics of flood class k (return periods k= 1:10-, 1:20-, 1:100-year flood);<br>E <sub>ij</sub> = timing of the crop rotation (for rice) (p. 1754).                                                                                                                                                                                                                                                                  | No                                          | No                         | Deterministic |                          |   |   |   |    |     |     |    |     |   |    |     |     |    |       |    |    |     |     |    |       |    |     |     |     |     |     |    |    |               |

| Reference                | Country     | Methodology            | Response variable                                                         | Water depth     | Duration        | Growth stage    | Others                                           | Rice variety                                      | Equation                                                                                                                                                                                                                                                                                                                                                                                                                                                                                                                                                                                                                                                                                                                                                                                                                                                                                                                                                  | Model validation | Transferability assessment | Model type    |
|--------------------------|-------------|------------------------|---------------------------------------------------------------------------|-----------------|-----------------|-----------------|--------------------------------------------------|---------------------------------------------------|-----------------------------------------------------------------------------------------------------------------------------------------------------------------------------------------------------------------------------------------------------------------------------------------------------------------------------------------------------------------------------------------------------------------------------------------------------------------------------------------------------------------------------------------------------------------------------------------------------------------------------------------------------------------------------------------------------------------------------------------------------------------------------------------------------------------------------------------------------------------------------------------------------------------------------------------------------------|------------------|----------------------------|---------------|
| Kwak et al. (2015)       | Bangladesh  | Empirical expert-based | damage ratio (in %) = the area of rice damage / total area of rice fields | Yes             | Yes (2 classes) | No              | Minimum damageable flood depth threshold at 0.3m | Single-cropped rain-fed Aman rice                 | <p>Piecewise linear functions; equation was not reported, but can be approximated by:</p> $LR = \begin{cases} 0 & \text{if } wd < 0.3 \\ m * wd - b & \text{if } 0.3 < wd < SLCS \\ 1, & \text{if } wd > SLCS \end{cases}$ <p>where LR = loss ratio (in %), m = slope and b= intercept.</p> <p>When duration = 8 days, the slope is:</p> $m = \frac{LR_{max} - LR_{min}}{SLCS - h_{min}} = \frac{60 - 15}{1.05 - 0.3} = \frac{45}{0.75} = 60$ <p>where LR<sub>max</sub> and LR<sub>min</sub> = the duration-specific maximum and minimum loss ratios, SLCS = the starting level of complete submergence, and h<sub>min</sub> = minimum damageable flood depth. The intercept b is calculated based on y=mx+b and point P(0.3 15):</p> $b = y - mx = 15 - 60 * 0.3 = -3.$ <p>When duration = 16 days, the slope is:</p> $m = \frac{100-25}{1.00-0.3} = \frac{75}{0.7} \approx 107.4 \text{ and the intercept is}$ $b = y - mx = 25 - 107.4 * 0.3 = -7.14.$ | No               | No                         | Deterministic |
| Samantaray et al. (2015) | India       | Experimental           | Damage (%)                                                                | Yes (3 classes) | Yes (6 classes) | No              | Rice variety                                     | Normal, shallow, medium deep, and deep water rice | Equation was not reported, but lookup tables for four rice varieties were provided.                                                                                                                                                                                                                                                                                                                                                                                                                                                                                                                                                                                                                                                                                                                                                                                                                                                                       | No               | No                         | Deterministic |
| Shrestha (2016)          | Philippines | Empirical expert-based | Yield loss (YL)                                                           | Yes             | Yes (5 classes) | Yes (4 classes) | No                                               | Not reported                                      | <p>Piecewise linear functions; equation was not reported, but can be approximated for each growth stage by:</p> $LR = \begin{cases} 0 & \text{if } wd < h_{min} \\ m_1 * wd - b_1 & \text{if } h_{min} < wd < x_1 \\ m_2 * wd - b_2 & \text{if } x_1 < wd < SLCS \\ 1, & \text{if } wd > SLCS \end{cases}$ <p>where LR = loss ratio (in %), h<sub>min</sub> = minimum damageable water depth, x<sub>1</sub> = water depth at partial submergence, and SLCS = starting level of complete submergence. The line connecting P<sub>1</sub>(h<sub>min</sub> LR at h<sub>min</sub>) and P<sub>2</sub>(x<sub>1</sub> LR at x<sub>1</sub>) is defined by y=m<sub>1</sub>x+b<sub>1</sub>. The line connecting P<sub>2</sub>(x<sub>1</sub> LR at x<sub>1</sub>) and P<sub>3</sub>(SLCS LR at SLCS) is defined by y=m<sub>2</sub>x+b<sub>2</sub>. The values are provided in the suppl. data.</p>                                                                    | Yes              | No                         | Deterministic |
| Huizinga et al. (2017)   | India       | Not reported           | Normalized damage factor                                                  | Yes             | No              | Yes (2 classes) | No                                               | Not reported                                      | Piecewise linear functions; equation was not reported, but data needed to recreate the functions is provided in the suppl. data.                                                                                                                                                                                                                                                                                                                                                                                                                                                                                                                                                                                                                                                                                                                                                                                                                          | No               | No                         | Deterministic |

| Reference                                         | Country                             | Methodology                           | Response variable                      | Water depth     | Duration        | Growth stage                                 | Others                                                                                      | Rice variety                                   | Equation                                                                                                                                                                                                                                                                                                                                                                                                                                                                                                                                                                                          | Model validation                                                                                           | Transferability assessment | Model type    |
|---------------------------------------------------|-------------------------------------|---------------------------------------|----------------------------------------|-----------------|-----------------|----------------------------------------------|---------------------------------------------------------------------------------------------|------------------------------------------------|---------------------------------------------------------------------------------------------------------------------------------------------------------------------------------------------------------------------------------------------------------------------------------------------------------------------------------------------------------------------------------------------------------------------------------------------------------------------------------------------------------------------------------------------------------------------------------------------------|------------------------------------------------------------------------------------------------------------|----------------------------|---------------|
| Nguyen et al. (2017)                              | Vietnam                             | Empirical                             | Damage ratio (y)                       | Yes             | No              | No (functions are for the harvesting period) | $h_{max}$ (defined as the water depth at which the damage ratio becomes 1)                  | Winter rice (used in Central Vietnam)          | Quadratic function: $y = ax^2 + (1 - a)x$ , with $(0 \leq a \leq 1)$ and calibrated parameters: $a=1$ , $h_{max}=3.1$ ; Exponential function: $y = \frac{1}{a-1} (a^x - 1)$ , with $(a > 1)$ and calibrated parameters: $a=431$ , $h_{max}=2.5$ ; and S-shape function: $y = \frac{1}{a-1} (a^x - 1)$ , with $(a > 0, b > 1)$ and calibrated parameters: $a=431$ , $b=5.8$ , where y is the damage ratio, $x=h/h_{max}$ , $h$ = water depth, $h_{max}$ = water depth at which the damage ratio becomes 1, and a and b are constants. a, b, and $h_{max}$ were calibrated using the SCE-UA method. | Yes (with district-level damage data from five districts in the Thach Han River Basin, Quang Tri Province) | No                         | Deterministic |
| Win et al. (2018)                                 | Myanmar                             | Empirical                             | Agricultural damage rate (ADR)         | Yes             | Yes (3 values)  | Yes (3 classes)                              | Investment into a farmer's field (Kyats/hectare)                                            | Deep-water rice variety                        | $ADR = \frac{\text{Agricultural damage value (Kyats/hectare)}}{\text{Agricultural gross income (kyats/hectare)}}$<br><br>"ADR was reformed by lognormal transformations [...] to normalize its distribution." The resulting ADR model is $\ln(ADR) = 0.000007 I + 0.66 FH + 0.012FD + 0d_1 - 0.05d_2 - 0.471d_3 - 1.91$ , where ADR = agricultural damage rate, I = investments into a farmer's field (Kyats/hectare), FD = flood duration (days), FH = flood height (meter), and $d_i$ are Boolean dummy variables (0 or 1) for the growth stage.                                                | Yes (p. 698)                                                                                               | No                         | Deterministic |
| Federal Emergency Management Agency (FEMA) (2020) | United States of America            | Empirical                             | Loss (L) in USD                        | No              | Yes (3 values)  | No                                           | Calendar date of flood                                                                      | Not reported                                   | $L = A(pY_0 - H) * D(t) * R(t)$ , where L = loss (USD), A = cultivated area (acres), P = price (USD/bushel), $Y_0$ = normal annual yield (bushels / acre), H = harvest cost (USD / acre), D(t) = crop loss at day t of the year (% of maximum net revenue), and R(t) = the crop loss modifier for flood duration (percent of maximum potential loss).                                                                                                                                                                                                                                             | No                                                                                                         | No                         | Deterministic |
| Hendrawan and Komori (2021)                       | Indonesia                           | Modeling based on remote-sensing data | Yield change (Y)                       | Yes             | Yes             | No                                           | Velocity                                                                                    | Monsoon rice crop                              | Three separate equations to predict y, the yield change (in %), were developed through multiple regressions:<br>1) $x = \text{max. water depth (in m)}$ : $y = 0.52 + 0.29 \cdot \ln(x)$<br>2) $x = \text{max. velocity (in m/s)}$ : $y = 3.4 + 0.95 \cdot \ln(x)$<br>3) $x = \text{max. duration (in days)}$ : $y = 2 + 0.97 \cdot \ln(x)$<br>No model that integrates all predictors was presented.                                                                                                                                                                                             | Yes                                                                                                        | No                         | Deterministic |
| Nguyen et al. (2021)                              | Vietnam (trained on secondary data) | Synthetic (using secondary data)      | Damage ratio (y)                       | Yes (4 classes) | Yes (9 classes) | Yes (3 classes)                              | No                                                                                          | NA2 and NA6 (summer-autumn rice)               | Synthetic lookup tables were developed based on global secondary global damage data from the literature and plant height of rice variety planted in Vietnam.                                                                                                                                                                                                                                                                                                                                                                                                                                      | Yes                                                                                                        | No                         | Deterministic |
| Shrestha (2021)                                   | Myanmar                             | Empirical                             | Yield loss (%)                         | Yes             | Yes (6 classes) | Yes (3 classes)                              | minimum damageable flood depth ( $h_{min}$ ), starting level of complete submergence (SLCS) | Rainfed rice, with max. plant height of 130 cm | Yield Loss (%) = $(h_{flood} - h_{min}) \times (a + b \times D_{flood})$<br>if $h_{flood} > SLCS$ , $h_{flood}$ = flood depth at SLCS<br>if Yield Loss < 0, Yield Loss = 0%<br>if Yield Loss > 100, Yield Loss = 100%                                                                                                                                                                                                                                                                                                                                                                             | Yes                                                                                                        | Yes                        | Deterministic |
| Khairul (2022)                                    | Bangladesh                          | Empirical                             | Percent rice yield damage (PRD) (in %) | Yes (5 values)  | Yes (3 classes) | No (only maturity stage)                     | No                                                                                          | Boro rice                                      | $PRD_i = 100 * RRY_i / MEY_i$ , where RRY <sub>i</sub> is the reduced rice yield due to flood and MEY <sub>i</sub> is the maximum expected normal rice yield.                                                                                                                                                                                                                                                                                                                                                                                                                                     | Yes                                                                                                        | No                         | Deterministic |

| Reference                     | Country           | Methodology | Response variable          | Water depth | Duration | Growth stage | Others | Rice variety                                                   | Equation                                                                                                                                                                                                                                                                                                                                                                                    | Model validation | Transferability assessment | Model type    |
|-------------------------------|-------------------|-------------|----------------------------|-------------|----------|--------------|--------|----------------------------------------------------------------|---------------------------------------------------------------------------------------------------------------------------------------------------------------------------------------------------------------------------------------------------------------------------------------------------------------------------------------------------------------------------------------------|------------------|----------------------------|---------------|
|                               |                   |             |                            |             |          |              |        |                                                                | Linear: $y = a + b \cdot x$ ; Logistic: $y = a / (1 + b e^{-cx})$ ; Natural Logarithm: $y = a + b \cdot \ln(x)$ ; Polynomial (3rd order): $y = ax^3 + bx^2 + cx + d$ ; Power: $y = a \cdot x^b$ (p. 8). Parameters are provided in Table 4 (p. 10). The polynomial regression model performed best for 1-3 day-floods. The logistic model performed best for 4-7 and >7 day-floods (p. 10). |                  |                            |               |
| Model developed in this study | Thailand, Myanmar | Empirical   | Relative yield loss (in %) | Yes         | No       | No           | No     | Myanmar: Shrestha et al. 2021 &                                | Linear regression [Deterministic stage-damage function] (see Table 4)                                                                                                                                                                                                                                                                                                                       | Yes              | Yes                        | Deterministic |
| Model developed in this study | Thailand, Myanmar | Empirical   | Relative yield loss (in %) | Yes         | No       | No           | No     | Win et al. 2018; Thailand: RD6 (56%) & White Jasmine 105 (38%) | Univariable Bayesian regression [Probabilistic stage-damage function] (see Table 4 and Suppl. Information Section 2.3)                                                                                                                                                                                                                                                                      | Yes              | Yes                        | Probabilistic |
| Model developed in this study | Thailand, Myanmar | Empirical   | Relative yield loss (in %) | Yes         | Yes      | Yes          | No     |                                                                | Multivariable Bayesian regression (see Table 4 and Suppl. Information Section 2.2)                                                                                                                                                                                                                                                                                                          | Yes              | Yes                        | Probabilistic |
| Model developed in this study | Thailand, Myanmar | Empirical   | Relative yield loss (in %) | Yes         | Yes      | Yes          | No     |                                                                | Random Forest (see Table 4 and Suppl. Information Section 2.1)                                                                                                                                                                                                                                                                                                                              | Yes              | Yes                        | Probabilistic |

## 4.2 Performance scores

Table S6 provides the performance scores (MAE, MBE, and Mean CRPS) obtained from the conducted model performance and transferability assessments. It covers the models developed by the authors – deterministic and probabilistic SDF, multivariate BRM and RF model – as generalized and localized models. The approaches used encompass Leave-one-out Cross Validation (LOO-CV), Leaven-nothing out (LNO), and cross-region validation (CRV). The performance comparison of the ramp function from the literature and the models trained with the dataset by Shrestha et al. (2021) is presented in Table S7. The model performance for floods with different characteristics is shown in Fig. S7.

## 4.3 Variable importance: Multivariable Bayesian Regression Model coefficients

The coefficients of the multivariable Bayesian regression (mod3 presented above) shown in Fig. S6 reveal submodel- and region-specific effects. In the generalized model, water depth and duration both have positive coefficients. In the localized model for Myanmar, water depth and duration have also positive coefficients. In contrast, the Thailand model has a positive water depth coefficient and a negative duration coefficient. These results suggest that while water depth is a consistent predictor across contexts, the role of duration varies between regions. Growth stage was found to be an important attribute for loss explanation in the literature. However, in all our model definitions, growth stage has the least coefficients and has a non-zero linear dependence only to zero-and-one inflation.

*Fig. S6: Multivariable Bayesian Regression Model coefficients. The Figure presents posterior mean estimates and 50% credible intervals for all parameters across four submodels –  $\mu$ ,  $\phi$ ,  $\text{zoi}$ , and  $\text{coi}$  – for the generalized model and two localized models (Myanmar and Thailand).*

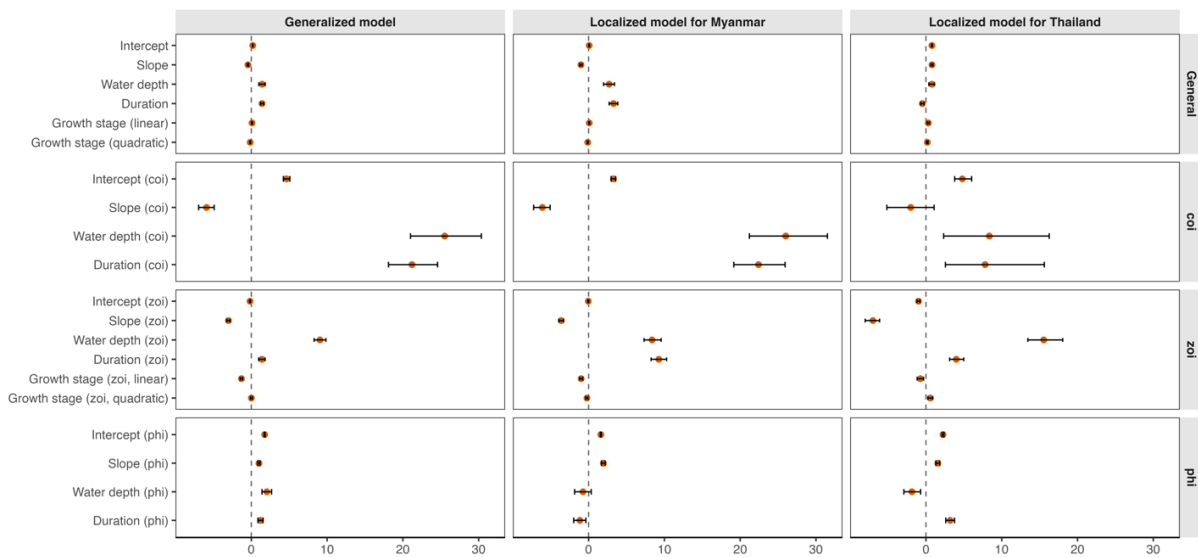

Table S6: Results of the performance evaluation and spatial transferability assessment for flood damage models created in this study. The mean across ten folds is shown for LOO-CV.

| Model type | Model name in R               | Model category               | Calibration                                                   | Validation         | Approach | MAE   | MBE    | Mean CRPS |
|------------|-------------------------------|------------------------------|---------------------------------------------------------------|--------------------|----------|-------|--------|-----------|
| RF         | model_rf_generalized_CV       | Generalized model            | fit with all the data excluding the training data for CV      | Myanmar            | LOO-CV   | 0.218 | -0.005 | 0.180     |
| BRM        | model_brm_generalized_CV      | Generalized model            | fit with all the data excluding the training data for CV      | Myanmar            | LOO-CV   | 0.223 | 0.010  | 0.135     |
| SDF (prob) | model_sdf_prob_generalized_CV | Generalized model            | fit with all the data excluding the training data for CV      | Myanmar            | LOO-CV   | 0.253 | -0.011 | 0.155     |
| SDF (det)  | model_sdf_det_generalized_CV  | Generalized model            | fit with all the data excluding the training data for CV      | Myanmar            | LOO-CV   | 0.268 | -0.018 | -         |
| RF         | model_rf_generalized_CV       | Generalized model            | fit with all the data excluding the training data for CV      | Myanmar & Thailand | LOO-CV   | 0.203 | -0.001 | 0.124     |
| BRM        | model_brm_generalized_CV      | Generalized model            | fit with all the data excluding the training data for CV      | Myanmar & Thailand | LOO-CV   | 0.223 | 0.002  | 0.142     |
| SDF (prob) | model_sdf_prob_generalized_CV | Generalized model            | fit with all the data excluding the training data for CV      | Myanmar & Thailand | LOO-CV   | 0.244 | 0.005  | 0.154     |
| SDF (det)  | model_sdf_det_generalized_CV  | Generalized model            | fit with all the data excluding the training data for CV      | Myanmar & Thailand | LOO-CV   | 0.263 | 0.004  | -         |
| RF         | model_rf_generalized_CV       | Generalized model            | fit with all the data excluding the training data for CV      | Thailand           | LOO-CV   | 0.144 | 0.015  | 0.106     |
| BRM        | model_brm_generalized_CV      | Generalized model            | fit with all the data excluding the training data for CV      | Thailand           | LOO-CV   | 0.166 | -0.003 | 0.114     |
| SDF (prob) | model_sdf_prob_generalized_CV | Generalized model            | fit with all the data excluding the training data for CV      | Thailand           | LOO-CV   | 0.186 | 0.052  | 0.128     |
| SDF (det)  | model_sdf_det_generalized_CV  | Generalized model            | fit with all the data excluding the training data for CV      | Thailand           | LOO-CV   | 0.185 | 0.066  | -         |
| RF         | model_rf_generalized          | Generalized model            | fit with all the data                                         | -                  | LNO      | -     | -      | -         |
| BRM        | model_brm_generalized         | Generalized model            | fit with all the data                                         | -                  | LNO      | -     | -      | -         |
| SDF (prob) | model_sdf_prob_generalized    | Generalized model            | fit with all the data                                         | -                  | LNO      | -     | -      | -         |
| SDF (det)  | model_sdf_det_generalized     | Generalized model            | fit with all the data                                         | -                  | LNO      | -     | -      | -         |
| RF         | model_rf_trained_MM_CV        | Localized model for Myanmar  | fit with the Myanmar data excluding the training data for CV  | Myanmar            | LOO-CV   | 0.220 | 0.002  | 0.179     |
| BRM        | model_brm_trained_MM_CV       | Localized model for Myanmar  | fit with the Myanmar data excluding the training data for CV  | Myanmar            | LOO-CV   | 0.209 | 0.002  | 0.130     |
| SDF (prob) | model_sdf_prob_trained_MM_CV  | Localized model for Myanmar  | fit with the Myanmar data excluding the training data for CV  | Myanmar            | LOO-CV   | 0.253 | 0.000  | 0.156     |
| SDF (det)  | model_sdf_det_trained_MM_CV   | Localized model for Myanmar  | fit with the Myanmar data excluding the training data for CV  | Myanmar            | LOO-CV   | 0.256 | -0.004 | -         |
| RF         | model_rf_trained_MM           | Localized model for Myanmar  | fit with all the Myanmar data                                 | Thailand           | CRV      | 0.192 | -0.009 | 0.146     |
| BRM        | model_brm_trained_MM          | Localized model for Myanmar  | fit with all the Myanmar data                                 | Thailand           | CRV      | 0.196 | -0.074 | 0.172     |
| SDF (prob) | model_sdf_prob_trained_MM     | Localized model for Myanmar  | fit with all the Myanmar data                                 | Thailand           | CRV      | 0.200 | 0.054  | 0.150     |
| SDF (det)  | model_sdf_det_trained_MM      | Localized model for Myanmar  | fit with all the Myanmar data                                 | Thailand           | CRV      | 0.262 | 0.059  | -         |
| RF         | model_rf_trained_TH_CV        | Localized model for Thailand | fit with the Thailand data excluding the training data for CV | Thailand           | LOO-CV   | 0.148 | 0.002  | 0.117     |
| BRM        | model_brm_trained_TH_CV       | Localized model for Thailand | fit with the Thailand data excluding the training data for CV | Thailand           | LOO-CV   | 0.156 | 0.012  | 0.103     |
| SDF (prob) | model_sdf_prob_trained_TH_CV  | Localized model for Thailand | fit with the Thailand data excluding the training data for CV | Thailand           | LOO-CV   | 0.155 | 0.020  | 0.101     |
| SDF (det)  | model_sdf_det_trained_TH_CV   | Localized model for Thailand | fit with the Thailand data excluding the training data for CV | Thailand           | LOO-CV   | 0.178 | 0.015  | -         |
| RF         | model_rf_trained_TH           | Localized model for Thailand | fit with all the Thailand data                                | Myanmar            | CRV      | 0.281 | -0.034 | 0.247     |
| BRM        | model_brm_trained_TH          | Localized model for Thailand | fit with all the Thailand data                                | Myanmar            | CRV      | 0.288 | -0.024 | 0.193     |
| SDF (prob) | model_sdf_prob_trained_TH     | Localized model for Thailand | fit with all the Thailand data                                | Myanmar            | CRV      | 0.272 | -0.045 | 0.187     |
| SDF (det)  | model_sdf_det_trained_TH      | Localized model for Thailand | fit with all the Thailand data                                | Myanmar            | CRV      | 0.285 | -0.100 | -         |

Table S7: Results of the performance evaluation and spatial transferability assessment for the ramp functions by Shrestha et al. 2021 and for flood damage models developed in this study re-trained with the dataset published by Shrestha et al. 2021. The mean across ten folds is shown for LOO-CV.

| Model type    | Model name in R                    | Model category                         | Calibration                                                             | Validation                          | Approach | MAE   | MBE    | Mean CRPS |
|---------------|------------------------------------|----------------------------------------|-------------------------------------------------------------------------|-------------------------------------|----------|-------|--------|-----------|
| Ramp function | model_ramp_trained_MM              | Localized model for Myanmar            | Model from the literature (Shrestha et al., 2021)                       | Myanmar & Thailand                  | -        | 0.233 | 0.053  | -         |
| Ramp function | model_ramp_trained_MM              | Localized model for Myanmar            | Model from the literature (Shrestha et al., 2021)                       | Myanmar (Shrestha et al. 2021 data) | -        | 0.235 | 0.032  | -         |
| Ramp function | model_ramp_trained_MM              | Localized model for Myanmar            | Model from the literature (Shrestha et al., 2021)                       | Myanmar (all the data)              | -        | 0.227 | 0.054  | -         |
| Ramp function | model_ramp_trained_MM              | Localized model for Myanmar            | Model from the literature (Shrestha et al., 2021)                       | Thailand                            | CRV      | 0.257 | 0.049  | -         |
| RF            | model_rf_trained_MM_Shrestha       | Localized model for Myanmar (Shrestha) | fit with the Myanmar (Shrestha) data                                    | Thailand                            | CRV      | 0.198 | 0.070  | 0.154     |
| BRM           | model_brm_trained_MM_Shrestha      | Localized model for Myanmar (Shrestha) | fit with the Myanmar (Shrestha) data                                    | Thailand                            | CRV      | 0.199 | -0.057 | 0.175     |
| SDF (prob)    | model_sdf_prob_trained_MM_Shrestha | Localized model for Myanmar (Shrestha) | fit with the Myanmar (Shrestha) data                                    | Thailand                            | CRV      | 0.211 | 0.108  | 0.149     |
| SDF (det)     | model_sdf_det_trained_MM_Shrestha  | Localized model for Myanmar (Shrestha) | fit with the Myanmar (Shrestha) data                                    | Thailand                            | CRV      | 0.291 | 0.046  | -         |
| RF            | model_rf_trained_MM_Shrestha       | Localized model for Myanmar (Shrestha) | fit with the Myanmar (Shrestha) data excluding the training data for CV | Myanmar (Shrestha)                  | LOO-CV   | 0.238 | -0.005 | 0.199     |
| BRM           | model_brm_trained_MM_Shrestha      | Localized model for Myanmar (Shrestha) | fit with the Myanmar (Shrestha) data excluding the training data for CV | Myanmar (Shrestha)                  | LOO-CV   | 0.232 | -0.010 | 0.151     |
| SDF (prob)    | model_sdf_prob_trained_MM_Shrestha | Localized model for Myanmar (Shrestha) | fit with the Myanmar (Shrestha) data excluding the training data for CV | Myanmar (Shrestha)                  | LOO-CV   | 0.284 | 0.004  | 0.178     |
| SDF (det)     | model_sdf_det_trained_MM_Shrestha  | Localized model for Myanmar (Shrestha) | fit with the Myanmar (Shrestha) data excluding the training data for CV | Myanmar (Shrestha)                  | LOO-CV   | 0.284 | 0.000  | -         |

Fig. S7: Model performance for flood events with specific characteristics. Data was partitioned into groups based on relative yield loss (low, medium, high, complete), water depth (shallow, medium, deep), duration (short, medium, long), and growth stage (vegetative, reproductive, maturity). Relative yield loss groups were created as equal-sized partitions, while water depth and duration are categorized based on the 25th and 75th percentiles.

Generalized models trained on all data, tested on all data

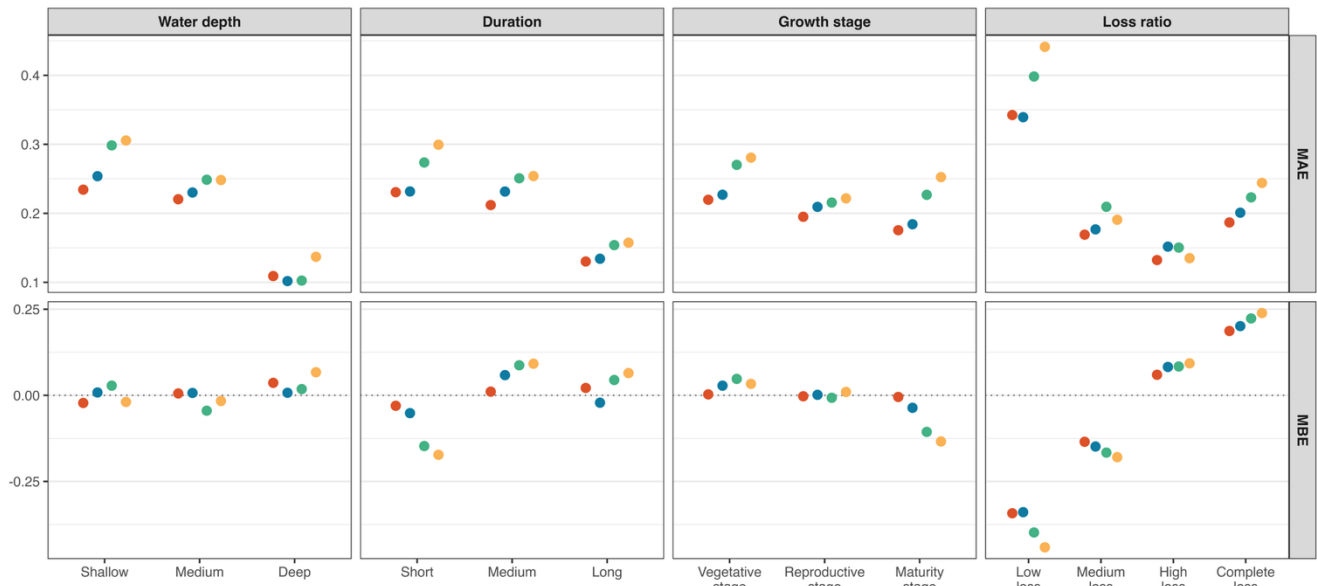

Localized models trained on Myanmar, tested on Thailand

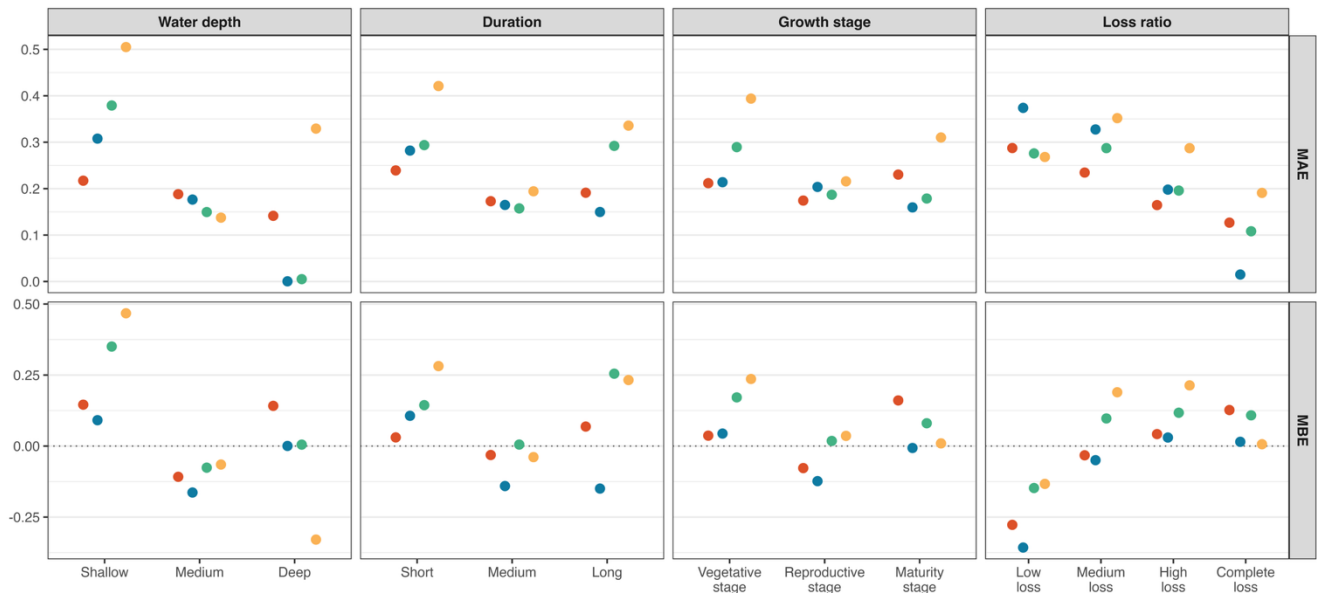

Localized models trained on Thailand, tested on Myanmar

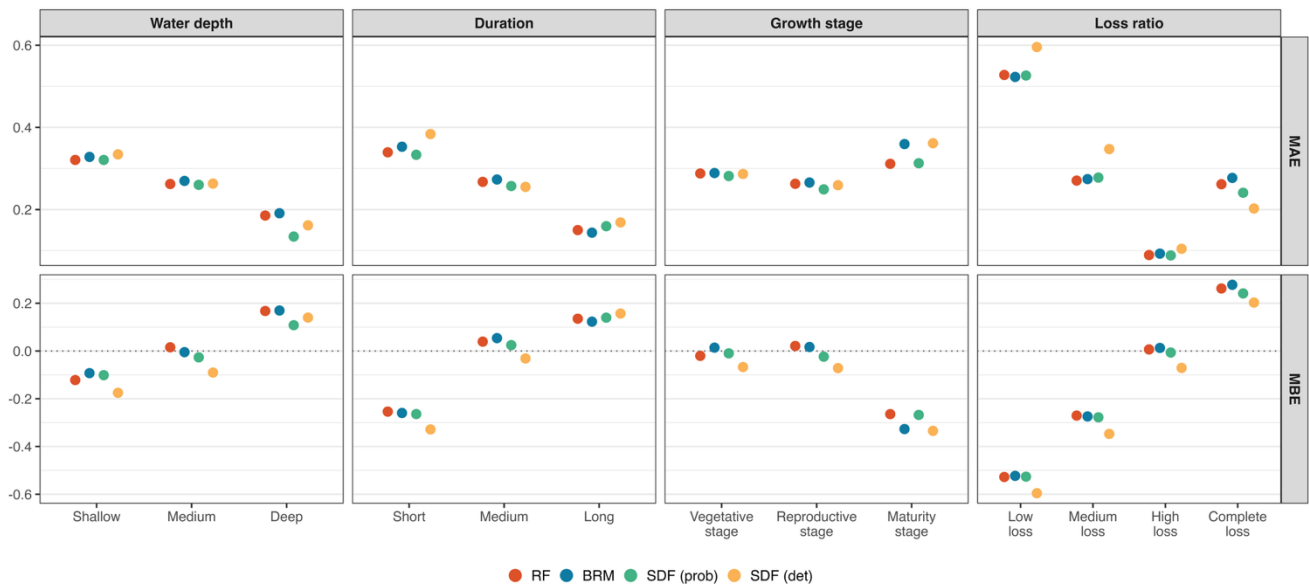

RF BRM SDF (prob) SDF (det)

#### 4.4 Model reporting: Lookup tables for generalized flood damage models for rice

In this section, we provide lookup tables for the generalized models developed in this study, including the deterministic SDF (Table S8), probabilistic SDF (Table S9), BRM (Table S10), and RF model (Table S11).

*Table S8: Lookup table for the deterministic stage-damage function*

| Water depth range (cm) | Water depth midpoint (cm) | Relative yield loss |
|------------------------|---------------------------|---------------------|
| 2–9                    | 5.5                       | 32.2                |
| 10–19                  | 14.5                      | 38.8                |
| 20–29                  | 24.5                      | 43.87               |
| 30–39                  | 34.5                      | 47.96               |
| 40–49                  | 44.5                      | 51.47               |
| 50–59                  | 54.5                      | 54.61               |
| 60–69                  | 64.5                      | 57.47               |
| 70–79                  | 74.5                      | 60.11               |
| 80–89                  | 84.5                      | 62.57               |
| 90–99                  | 94.5                      | 64.9                |
| 100–109                | 104.5                     | 67.1                |
| 110–119                | 114.5                     | 69.2                |
| 120–129                | 124.5                     | 71.21               |
| 130–139                | 134.5                     | 73.14               |
| 140–149                | 144.5                     | 75                  |
| 150–159                | 154.5                     | 76.8                |
| 160–169                | 164.5                     | 78.53               |
| 170–179                | 174.5                     | 80.22               |
| 180–189                | 184.5                     | 81.86               |
| 190–199                | 194.5                     | 83.45               |
| 200–209                | 204.5                     | 85.01               |
| 210–219                | 214.5                     | 86.52               |
| 220–229                | 224.5                     | 88                  |
| 230–239                | 234.5                     | 89.45               |
| 240–249                | 244.5                     | 90.87               |
| 250–259                | 254.5                     | 92.26               |
| 260–269                | 264.5                     | 93.62               |
| 270–279                | 274.5                     | 94.96               |
| 280–289                | 284.5                     | 96.27               |
| 290–299                | 294.5                     | 97.56               |
| 300–309                | 304.5                     | 98.83               |
| >300                   |                           | 100                 |

*Table S9: Lookup table for the probabilistic stage-damage function*

| Water depth range (cm) | Water depth midpoint (cm) | Relative yield loss (median) | Relative yield loss (q25) | Relative yield loss (q75) |
|------------------------|---------------------------|------------------------------|---------------------------|---------------------------|
| 2–9                    | 5.5                       | 27.32                        | 17.59                     | 39.5                      |
| 10–19                  | 14.5                      | 29.29                        | 19.15                     | 42.01                     |
| 20–29                  | 24.5                      | 29.98                        | 20.06                     | 42.32                     |
| 30–39                  | 34.5                      | 31.61                        | 20.89                     | 44.5                      |
| 40–49                  | 44.5                      | 34.19                        | 22.68                     | 46.38                     |
| 50–59                  | 54.5                      | 38.19                        | 26.1                      | 50.55                     |
| 60–69                  | 64.5                      | 42.34                        | 30.16                     | 54.96                     |
| 70–79                  | 74.5                      | 46.96                        | 34.7                      | 60.32                     |
| 80–89                  | 84.5                      | 53.04                        | 40.97                     | 68.37                     |
| 90–99                  | 94.5                      | 59.35                        | 46.67                     | 79.67                     |
| 100–109                | 104.5                     | 65.96                        | 53.39                     | 82.98                     |
| 110–119                | 114.5                     | 73.1                         | 59.38                     | 86.55                     |
| 120–129                | 124.5                     | 77.46                        | 63.68                     | 88.73                     |
| 130–139                | 134.5                     | 87.19                        | 71.01                     | 93.59                     |
| 140–149                | 144.5                     | 100                          | 79.85                     | 100                       |
| 150–159                | 154.5                     | 100                          | 82.31                     | 100                       |
| 160–169                | 164.5                     | 100                          | 84.68                     | 100                       |
| 170–179                | 174.5                     | 100                          | 86.29                     | 100                       |
| 180–189                | 184.5                     | 100                          | 89.79                     | 100                       |
| 190–199                | 194.5                     | 100                          | 93.83                     | 100                       |
| >200                   |                           | 100                          | 100                       | 100                       |

Table S10: Lookup table for the Bayesian Regression Model (BRM)

| Duration<br>(days) | Water depth<br>range (cm) | Water depth<br>midpoint<br>(cm) | Relative<br>yield loss<br>(median) | Relative<br>yield loss<br>(q25) | Relative<br>yield loss<br>(q75) |
|--------------------|---------------------------|---------------------------------|------------------------------------|---------------------------------|---------------------------------|
| Vegetative stage   |                           |                                 |                                    |                                 |                                 |
| 4                  | 2–19                      | 10.5                            | 29.67                              | 9.83                            | 53.39                           |
| 4                  | 20–39                     | 29.5                            | 28.81                              | 7.84                            | 51.82                           |
| 4                  | 40–59                     | 49.5                            | 29.02                              | 4.91                            | 53.82                           |
| 4                  | 60–79                     | 69.5                            | 27.68                              | 0                               | 51.87                           |
| 4                  | 80–99                     | 89.5                            | 33.01                              | 0                               | 60.48                           |
| 4                  | 100–119                   | 109.5                           | 45.3                               | 10.36                           | 91.73                           |
| 4                  | 120–139                   | 129.5                           | 61.54                              | 25.9                            | 100                             |
| 4                  | 140–159                   | 149.5                           | 100                                | 45.91                           | 100                             |
| 4                  | 160–179                   | 169.5                           | 100                                | 62.22                           | 100                             |
| 4                  | >180                      |                                 | 100                                | 100                             | 100                             |
| 8                  | 2–19                      | 10.5                            | 31.26                              | 10.28                           | 54.28                           |
| 8                  | 20–39                     | 29.5                            | 31.3                               | 9.47                            | 54.33                           |
| 8                  | 40–59                     | 49.5                            | 31.54                              | 5.85                            | 55.85                           |
| 8                  | 60–79                     | 69.5                            | 34.8                               | 6.26                            | 60.78                           |
| 8                  | 80–99                     | 89.5                            | 41.01                              | 11.24                           | 73.47                           |
| 8                  | 100–119                   | 109.5                           | 57.96                              | 26.06                           | 100                             |
| 8                  | 120–139                   | 129.5                           | 100                                | 41.48                           | 100                             |
| 8                  | 140–159                   | 149.5                           | 100                                | 55.85                           | 100                             |
| 8                  | 160–179                   | 169.5                           | 100                                | 71.34                           | 100                             |
| 8                  | >180                      |                                 | 100                                | 100                             | 100                             |
| 12                 | 2–19                      | 10.5                            | 32.33                              | 11.59                           | 55.03                           |
| 12                 | 20–39                     | 29.5                            | 32.55                              | 11.26                           | 56.7                            |
| 12                 | 40–59                     | 49.5                            | 35.64                              | 11.47                           | 61.06                           |
| 12                 | 60–79                     | 69.5                            | 42.26                              | 15.39                           | 69.93                           |
| 12                 | 80–99                     | 89.5                            | 53.47                              | 24.38                           | 100                             |
| 12                 | 100–119                   | 109.5                           | 70.87                              | 37.89                           | 100                             |
| 12                 | 120–139                   | 129.5                           | 100                                | 49.99                           | 100                             |
| 12                 | 140–159                   | 149.5                           | 100                                | 61.24                           | 100                             |
| 12                 | 160–179                   | 169.5                           | 100                                | 81.44                           | 100                             |
| 12                 | >170                      |                                 | 100                                | 100                             | 100                             |
| 16                 | 2–19                      | 10.5                            | 35.51                              | 13.94                           | 57.53                           |
| 16                 | 20–39                     | 29.5                            | 36.61                              | 14.46                           | 60.62                           |
| 16                 | 40–59                     | 49.5                            | 40.36                              | 16.72                           | 65.58                           |
| 16                 | 60–79                     | 69.5                            | 50.86                              | 25.07                           | 83.85                           |
| 16                 | 80–99                     | 89.5                            | 63.46                              | 34.39                           | 100                             |
| 16                 | 100–119                   | 109.5                           | 86.11                              | 44.95                           | 100                             |
| 16                 | 120–139                   | 129.5                           | 100                                | 56.86                           | 100                             |
| 16                 | 140–159                   | 149.5                           | 100                                | 70.19                           | 100                             |
| 16                 | >170                      |                                 | 100                                | 100                             | 100                             |
| 20                 | 2–19                      | 10.5                            | 36.63                              | 16.04                           | 59.31                           |
| 20                 | 20–39                     | 29.5                            | 40.88                              | 19.9                            | 65.08                           |
| 20                 | 40–59                     | 49.5                            | 47.34                              | 23.51                           | 75.39                           |
| 20                 | 60–79                     | 69.5                            | 57                                 | 31.99                           | 100                             |
| 20                 | 80–99                     | 89.5                            | 72.78                              | 42.62                           | 100                             |
| 20                 | 100–119                   | 109.5                           | 100                                | 50.25                           | 100                             |
| 20                 | 120–139                   | 129.5                           | 100                                | 58.18                           | 100                             |
| 20                 | 140–159                   | 149.5                           | 100                                | 72.35                           | 100                             |
| 20                 | >160                      |                                 | 100                                | 100                             | 100                             |

| Duration<br>(days)        | Water depth<br>range (cm) | Water depth<br>midpoint<br>(cm) | Relative<br>yield loss<br>(median) | Relative<br>yield loss<br>(q25) | Relative<br>yield loss<br>(q75) |
|---------------------------|---------------------------|---------------------------------|------------------------------------|---------------------------------|---------------------------------|
| <b>Reproductive stage</b> |                           |                                 |                                    |                                 |                                 |
| 4                         | 2–19                      | 10.5                            | 39.91                              | 18.32                           | 61.69                           |
| 4                         | 20–39                     | 29.5                            | 40.33                              | 18.72                           | 61.11                           |
| 4                         | 40–59                     | 49.5                            | 42.47                              | 20.23                           | 62.88                           |
| 4                         | 60–79                     | 69.5                            | 41.59                              | 18.61                           | 62.31                           |
| 4                         | 80–99                     | 89.5                            | 44.98                              | 21.75                           | 66.67                           |
| 4                         | 100–119                   | 109.5                           | 51.89                              | 28.35                           | 74.96                           |
| 4                         | 120–139                   | 129.5                           | 58.74                              | 35.07                           | 92.84                           |
| 4                         | 140–159                   | 149.5                           | 70.13                              | 44.23                           | 100                             |
| 4                         | 160–179                   | 169.5                           | 85.72                              | 51.24                           | 100                             |
| 4                         | 180–199                   | 189.5                           | 100                                | 60.22                           | 100                             |
| 4                         | >220                      |                                 | 100                                | 100                             | 100                             |
| 8                         | 2–19                      | 10.5                            | 41.15                              | 20.18                           | 62.82                           |
| 8                         | 20–39                     | 29.5                            | 42.04                              | 21.51                           | 63.98                           |
| 8                         | 40–59                     | 49.5                            | 44.67                              | 22.53                           | 64.67                           |
| 8                         | 60–79                     | 69.5                            | 46.2                               | 23.03                           | 66.36                           |
| 8                         | 80–99                     | 89.5                            | 50.98                              | 28.56                           | 73.12                           |
| 8                         | 100–119                   | 109.5                           | 55.82                              | 34.21                           | 81.66                           |
| 8                         | 120–139                   | 129.5                           | 63.34                              | 41.18                           | 100                             |
| 8                         | 140–159                   | 149.5                           | 78.63                              | 51.51                           | 100                             |
| 8                         | 160–179                   | 169.5                           | 100                                | 56.06                           | 100                             |
| 8                         | 180–199                   | 189.5                           | 100                                | 65.54                           | 100                             |
| 8                         | >220                      |                                 | 100                                | 100                             | 100                             |
| 12                        | 2–19                      | 10.5                            | 43.59                              | 22.4                            | 65.16                           |
| 12                        | 20–39                     | 29.5                            | 43.27                              | 23.04                           | 63.54                           |
| 12                        | 40–59                     | 49.5                            | 46.86                              | 26.13                           | 67.66                           |
| 12                        | 60–79                     | 69.5                            | 49.71                              | 28.26                           | 70.71                           |
| 12                        | 80–99                     | 89.5                            | 54.54                              | 34.47                           | 77.82                           |
| 12                        | 100–119                   | 109.5                           | 62.21                              | 42.28                           | 94.48                           |
| 12                        | 120–139                   | 129.5                           | 71.85                              | 47.85                           | 100                             |
| 12                        | 140–159                   | 149.5                           | 82.62                              | 53.7                            | 100                             |
| 12                        | 160–179                   | 169.5                           | 100                                | 60.3                            | 100                             |
| 12                        | 180–199                   | 189.5                           | 100                                | 67.71                           | 100                             |
| 12                        | >220                      |                                 | 100                                | 100                             | 100                             |
| 16                        | 2–19                      | 10.5                            | 46.56                              | 26.08                           | 65.98                           |
| 16                        | 20–39                     | 29.5                            | 47                                 | 25.87                           | 67.86                           |
| 16                        | 40–59                     | 49.5                            | 49.75                              | 28.95                           | 69.27                           |
| 16                        | 60–79                     | 69.5                            | 53.03                              | 33.61                           | 73.22                           |
| 16                        | 80–99                     | 89.5                            | 59.07                              | 38.58                           | 84.14                           |
| 16                        | 100–119                   | 109.5                           | 65.92                              | 44.71                           | 100                             |
| 16                        | 120–139                   | 129.5                           | 73.53                              | 50.75                           | 100                             |
| 16                        | 140–159                   | 149.5                           | 84.1                               | 56.52                           | 100                             |
| 16                        | 160–179                   | 169.5                           | 100                                | 61.75                           | 100                             |
| 16                        | 180–199                   | 189.5                           | 100                                | 70.25                           | 100                             |
| 16                        | >210                      |                                 | 100                                | 100                             | 100                             |
| 20                        | 2–19                      | 10.5                            | 47.97                              | 26.17                           | 68.48                           |
| 20                        | 20–39                     | 29.5                            | 50.28                              | 29.64                           | 70.72                           |
| 20                        | 40–59                     | 49.5                            | 54.77                              | 34.64                           | 73.87                           |
| 20                        | 60–79                     | 69.5                            | 57.19                              | 37.48                           | 78.3                            |
| 20                        | 80–99                     | 89.5                            | 62.98                              | 43.1                            | 88.31                           |
| 20                        | 100–119                   | 109.5                           | 68.06                              | 48.13                           | 100                             |
| 20                        | 120–139                   | 129.5                           | 79.14                              | 54.44                           | 100                             |
| 20                        | 140–159                   | 149.5                           | 90                                 | 59.46                           | 100                             |
| 20                        | 160–179                   | 169.5                           | 100                                | 63.46                           | 100                             |
| 20                        | 180–199                   | 189.5                           | 100                                | 74.33                           | 100                             |
| 20                        | >210                      |                                 | 100                                | 100                             | 100                             |

| Duration<br>(days) | Water depth<br>range (cm) | Water depth<br>midpoint<br>(cm) | Relative<br>yield loss<br>(median) | Relative<br>yield loss<br>(q25) | Relative<br>yield loss<br>(q75) |
|--------------------|---------------------------|---------------------------------|------------------------------------|---------------------------------|---------------------------------|
| Maturity stage     |                           |                                 |                                    |                                 |                                 |
| 4                  | 2–19                      | 10.5                            | 36.3                               | 17.72                           | 59.15                           |
| 4                  | 20–39                     | 29.5                            | 38.87                              | 19.38                           | 60.51                           |
| 4                  | 40–59                     | 49.5                            | 39.35                              | 20.52                           | 59.78                           |
| 4                  | 60–79                     | 69.5                            | 41.42                              | 23.83                           | 61.23                           |
| 4                  | 80–99                     | 89.5                            | 43.9                               | 25.84                           | 63.44                           |
| 4                  | 100–119                   | 109.5                           | 48.45                              | 28.21                           | 68.1                            |
| 4                  | 120–139                   | 129.5                           | 50.78                              | 31.83                           | 72.42                           |
| 4                  | 140–159                   | 149.5                           | 57.27                              | 37.66                           | 81.77                           |
| 4                  | 160–179                   | 169.5                           | 63.46                              | 43.03                           | 100                             |
| 4                  | 180–199                   | 189.5                           | 70.61                              | 47.09                           | 100                             |
| 4                  | >280                      |                                 | 100                                | 100                             | 100                             |
| 8                  | 2–19                      | 10.5                            | 38.83                              | 20.32                           | 60.17                           |
| 8                  | 20–39                     | 29.5                            | 39.45                              | 21.83                           | 60.91                           |
| 8                  | 40–59                     | 49.5                            | 41.89                              | 22.91                           | 62.05                           |
| 8                  | 60–79                     | 69.5                            | 44.67                              | 26.12                           | 63.55                           |
| 8                  | 80–99                     | 89.5                            | 45.85                              | 27.68                           | 66.01                           |
| 8                  | 100–119                   | 109.5                           | 50.53                              | 32.51                           | 70.22                           |
| 8                  | 120–139                   | 129.5                           | 55.38                              | 36.72                           | 77.97                           |
| 8                  | 140–159                   | 149.5                           | 59.95                              | 40.74                           | 88.3                            |
| 8                  | 160–179                   | 169.5                           | 66.14                              | 44.5                            | 100                             |
| 8                  | 180–199                   | 189.5                           | 71.32                              | 49.52                           | 100                             |
| 8                  | >270                      |                                 | 100                                | 100                             | 100                             |
| 12                 | 2–19                      | 10.5                            | 40.42                              | 21.93                           | 61.65                           |
| 12                 | 20–39                     | 29.5                            | 43                                 | 24.14                           | 62.52                           |
| 12                 | 40–59                     | 49.5                            | 44.63                              | 25.81                           | 63.21                           |
| 12                 | 60–79                     | 69.5                            | 46.71                              | 28.6                            | 66.28                           |
| 12                 | 80–99                     | 89.5                            | 49.92                              | 30.99                           | 68.58                           |
| 12                 | 100–119                   | 109.5                           | 54.14                              | 35.85                           | 74.89                           |
| 12                 | 120–139                   | 129.5                           | 57.3                               | 38.35                           | 79.49                           |
| 12                 | 140–159                   | 149.5                           | 62.9                               | 43.49                           | 96.61                           |
| 12                 | 160–179                   | 169.5                           | 68.67                              | 48.5                            | 100                             |
| 12                 | 180–199                   | 189.5                           | 75.02                              | 51.75                           | 100                             |
| 12                 | >270                      |                                 | 100                                | 100                             | 100                             |
| 16                 | 2–19                      | 10.5                            | 43.23                              | 24.54                           | 63.21                           |
| 16                 | 20–39                     | 29.5                            | 44.35                              | 25.78                           | 63.62                           |
| 16                 | 40–59                     | 49.5                            | 47.47                              | 28.55                           | 66.67                           |
| 16                 | 60–79                     | 69.5                            | 48.9                               | 30.37                           | 67.63                           |
| 16                 | 80–99                     | 89.5                            | 52.41                              | 34.94                           | 70.47                           |
| 16                 | 100–119                   | 109.5                           | 56.36                              | 38.2                            | 76.22                           |
| 16                 | 120–139                   | 129.5                           | 60.5                               | 42.13                           | 83.42                           |
| 16                 | 140–159                   | 149.5                           | 64.32                              | 46.4                            | 100                             |
| 16                 | 160–179                   | 169.5                           | 69.2                               | 48.78                           | 100                             |
| 16                 | 180–199                   | 189.5                           | 77.93                              | 54.13                           | 100                             |
| 16                 | >270                      |                                 | 100                                | 100                             | 100                             |
| 20                 | 2–19                      | 10.5                            | 45.17                              | 25.59                           | 64.72                           |
| 20                 | 20–39                     | 29.5                            | 46.29                              | 27.09                           | 65.18                           |
| 20                 | 40–59                     | 49.5                            | 48.3                               | 30.53                           | 67.23                           |
| 20                 | 60–79                     | 69.5                            | 51.41                              | 34.03                           | 70.06                           |
| 20                 | 80–99                     | 89.5                            | 55.08                              | 37.99                           | 73.54                           |
| 20                 | 100–119                   | 109.5                           | 57.84                              | 40.89                           | 77.4                            |
| 20                 | 120–139                   | 129.5                           | 61.79                              | 44.49                           | 84.18                           |
| 20                 | 140–159                   | 149.5                           | 65.81                              | 47.78                           | 100                             |
| 20                 | 160–179                   | 169.5                           | 71.88                              | 53.06                           | 100                             |
| 20                 | 180–199                   | 189.5                           | 80.31                              | 57.07                           | 100                             |
| 20                 | >270                      |                                 | 100                                | 100                             | 100                             |

Table S11: Lookup table for the Random Forest (RF) model (trained on Myanmar & Thailand data)

| Duration<br>(days) | Water depth<br>range (cm) | Water depth<br>midpoint<br>(cm) | Relative<br>yield loss<br>(mean) | Relative<br>yield loss<br>(q25) | Relative<br>yield loss<br>(q75) |
|--------------------|---------------------------|---------------------------------|----------------------------------|---------------------------------|---------------------------------|
| Vegetative stage   |                           |                                 |                                  |                                 |                                 |
| 4                  | 2–19                      | 10.5                            | 44.53                            | 35.5                            | 51.05                           |
| 4                  | 20–39                     | 29.5                            | 40.73                            | 34.43                           | 44.99                           |
| 4                  | 40–59                     | 49.5                            | 40.1                             | 33.87                           | 44.38                           |
| 4                  | 60–79                     | 69.5                            | 41.16                            | 34.83                           | 44.38                           |
| 4                  | 80–99                     | 89.5                            | 42.38                            | 36.48                           | 44.99                           |
| 4                  | 100–119                   | 109.5                           | 52.94                            | 42.14                           | 61.82                           |
| 4                  | 120–139                   | 129.5                           | 53.41                            | 42.86                           | 60                              |
| 4                  | 140–159                   | 149.5                           | 63.22                            | 47.07                           | 75.17                           |
| 4                  | 160–179                   | 169.5                           | 79.41                            | 61.75                           | 94.67                           |
| 4                  | 180–199                   | 189.5                           | 80.6                             | 61.75                           | 98.33                           |
| 4                  | >200                      |                                 | 81.01                            | 61.75                           | 98.58                           |
| 8                  | 2–19                      | 10.5                            | 47.45                            | 37.44                           | 53.03                           |
| 8                  | 20–39                     | 29.5                            | 43.67                            | 36.54                           | 48.48                           |
| 8                  | 40–59                     | 49.5                            | 42.93                            | 36.48                           | 47.07                           |
| 8                  | 60–79                     | 69.5                            | 43.48                            | 36.54                           | 47.32                           |
| 8                  | 80–99                     | 89.5                            | 44.31                            | 37.24                           | 48.48                           |
| 8                  | 100–119                   | 109.5                           | 52.38                            | 41.07                           | 60.09                           |
| 8                  | 120–139                   | 129.5                           | 52.72                            | 41.07                           | 59.62                           |
| 8                  | 140–159                   | 149.5                           | 62.47                            | 46.13                           | 75.13                           |
| 8                  | 160–179                   | 169.5                           | 78.8                             | 58.37                           | 94.67                           |
| 8                  | 180–199                   | 189.5                           | 79.99                            | 58.37                           | 98.33                           |
| 8                  | >200                      |                                 | 80.41                            | 58.37                           | 98.58                           |
| 12                 | 2–19                      | 10.5                            | 59.05                            | 48.96                           | 68.02                           |
| 12                 | 20–39                     | 29.5                            | 55.57                            | 44.99                           | 64.98                           |
| 12                 | 40–59                     | 49.5                            | 55.33                            | 44.52                           | 64.94                           |
| 12                 | 60–79                     | 69.5                            | 55.89                            | 44.99                           | 64.94                           |
| 12                 | 80–99                     | 89.5                            | 56.8                             | 45.27                           | 65.59                           |
| 12                 | 100–119                   | 109.5                           | 64.91                            | 59.24                           | 70.06                           |
| 12                 | 120–139                   | 129.5                           | 65.52                            | 59.24                           | 70.31                           |
| 12                 | 140–159                   | 149.5                           | 72.04                            | 61.75                           | 82.9                            |
| 12                 | 160–179                   | 169.5                           | 85.96                            | 71.89                           | 98.11                           |
| 12                 | 180–199                   | 189.5                           | 87.61                            | 72.78                           | 98.58                           |
| 12                 | >200                      |                                 | 88.14                            | 72.78                           | 98.67                           |
| 16                 | 2–19                      | 10.5                            | 68.26                            | 62.81                           | 74.77                           |
| 16                 | 20–39                     | 29.5                            | 66                               | 61.95                           | 73.72                           |
| 16                 | 40–59                     | 49.5                            | 66.22                            | 61.95                           | 73.72                           |
| 16                 | 60–79                     | 69.5                            | 67.04                            | 61.98                           | 73.99                           |
| 16                 | 80–99                     | 89.5                            | 67.91                            | 62.15                           | 74.77                           |
| 16                 | 100–119                   | 109.5                           | 72.41                            | 65.85                           | 80.19                           |
| 16                 | 120–139                   | 129.5                           | 73.37                            | 66.28                           | 82.74                           |
| 16                 | 140–159                   | 149.5                           | 75.94                            | 67.97                           | 83.42                           |
| 16                 | 160–179                   | 169.5                           | 89.53                            | 85.18                           | 98.33                           |
| 16                 | 180–199                   | 189.5                           | 91.69                            | 89.35                           | 98.67                           |
| 16                 | >200                      |                                 | 92.29                            | 93.72                           | 98.67                           |
| 20                 | 2–19                      | 10.5                            | 75.34                            | 67.69                           | 83.52                           |
| 20                 | 20–39                     | 29.5                            | 73.22                            | 66.4                            | 83.52                           |
| 20                 | 40–59                     | 49.5                            | 73.42                            | 66.41                           | 83.52                           |
| 20                 | 60–79                     | 69.5                            | 75.43                            | 68.02                           | 84.29                           |
| 20                 | 80–99                     | 89.5                            | 76.81                            | 71.89                           | 84.96                           |
| 20                 | 100–119                   | 109.5                           | 83.18                            | 79.9                            | 87.37                           |
| 20                 | 120–139                   | 129.5                           | 83.54                            | 80.75                           | 88.75                           |
| 20                 | 140–159                   | 149.5                           | 81.84                            | 75.26                           | 86.67                           |
| 20                 | 160–179                   | 169.5                           | 92.58                            | 89.62                           | 98.4                            |
| 20                 | 180–199                   | 189.5                           | 94.76                            | 94.69                           | 98.67                           |
| 20                 | >200                      |                                 | 95.47                            | 97.86                           | 98.72                           |

| Duration<br>(days)        | Water depth<br>range (cm) | Water depth<br>midpoint<br>(cm) | Relative<br>yield loss<br>(mean) | Relative<br>yield loss<br>(q25) | Relative<br>yield loss<br>(q75) |
|---------------------------|---------------------------|---------------------------------|----------------------------------|---------------------------------|---------------------------------|
| <b>Reproductive stage</b> |                           |                                 |                                  |                                 |                                 |
| 4                         | 2–19                      | 10.5                            | 45.99                            | 35.55                           | 55.04                           |
| 4                         | 20–39                     | 29.5                            | 41.9                             | 32.08                           | 51.29                           |
| 4                         | 40–59                     | 49.5                            | 41.07                            | 31.98                           | 48.93                           |
| 4                         | 60–79                     | 69.5                            | 41.5                             | 33.51                           | 48.4                            |
| 4                         | 80–99                     | 89.5                            | 42.22                            | 35.25                           | 48.93                           |
| 4                         | 100–119                   | 109.5                           | 57.85                            | 49.45                           | 65.27                           |
| 4                         | 120–139                   | 129.5                           | 56.78                            | 49.72                           | 62.04                           |
| 4                         | 140–159                   | 149.5                           | 66.84                            | 56.88                           | 73.89                           |
| 4                         | 160–179                   | 169.5                           | 79.37                            | 66.52                           | 92.78                           |
| 4                         | 180–199                   | 189.5                           | 81.88                            | 66.76                           | 95.4                            |
| 4                         | >200                      |                                 | 82.57                            | 66.76                           | 96.98                           |
| 8                         | 2–19                      | 10.5                            | 51.28                            | 40.22                           | 57.63                           |
| 8                         | 20–39                     | 29.5                            | 47.28                            | 38.83                           | 55.33                           |
| 8                         | 40–59                     | 49.5                            | 46.35                            | 38.31                           | 53.72                           |
| 8                         | 60–79                     | 69.5                            | 46.43                            | 38.38                           | 53.26                           |
| 8                         | 80–99                     | 89.5                            | 46.87                            | 39.11                           | 53.46                           |
| 8                         | 100–119                   | 109.5                           | 58.94                            | 54.52                           | 64.73                           |
| 8                         | 120–139                   | 129.5                           | 57.66                            | 53.72                           | 61.31                           |
| 8                         | 140–159                   | 149.5                           | 66.79                            | 56.92                           | 73.89                           |
| 8                         | 160–179                   | 169.5                           | 79.15                            | 63.36                           | 92.78                           |
| 8                         | 180–199                   | 189.5                           | 81.66                            | 63.97                           | 95.4                            |
| 8                         | >200                      |                                 | 82.36                            | 63.97                           | 96.98                           |
| 12                        | 2–19                      | 10.5                            | 59.29                            | 52.49                           | 67.78                           |
| 12                        | 20–39                     | 29.5                            | 55.63                            | 48.35                           | 63.48                           |
| 12                        | 40–59                     | 49.5                            | 55.19                            | 46.96                           | 63.35                           |
| 12                        | 60–79                     | 69.5                            | 55.27                            | 45.87                           | 63.35                           |
| 12                        | 80–99                     | 89.5                            | 55.7                             | 46.85                           | 63.48                           |
| 12                        | 100–119                   | 109.5                           | 64.78                            | 59.14                           | 70.1                            |
| 12                        | 120–139                   | 129.5                           | 64.25                            | 59.14                           | 69.12                           |
| 12                        | 140–159                   | 149.5                           | 71.47                            | 62.05                           | 75.69                           |
| 12                        | 160–179                   | 169.5                           | 83.28                            | 73.89                           | 92.78                           |
| 12                        | 180–199                   | 189.5                           | 86.66                            | 73.89                           | 95.9                            |
| 12                        | >200                      |                                 | 87.61                            | 73.89                           | 98.46                           |
| 16                        | 2–19                      | 10.5                            | 68.67                            | 63.46                           | 73.94                           |
| 16                        | 20–39                     | 29.5                            | 66.22                            | 61.98                           | 73.66                           |
| 16                        | 40–59                     | 49.5                            | 66.26                            | 61.55                           | 73.66                           |
| 16                        | 60–79                     | 69.5                            | 66.56                            | 61.71                           | 73.89                           |
| 16                        | 80–99                     | 89.5                            | 66.99                            | 61.85                           | 73.89                           |
| 16                        | 100–119                   | 109.5                           | 72.92                            | 68.87                           | 77.87                           |
| 16                        | 120–139                   | 129.5                           | 72.72                            | 68.38                           | 77.93                           |
| 16                        | 140–159                   | 149.5                           | 74.38                            | 69.76                           | 77.93                           |
| 16                        | 160–179                   | 169.5                           | 85.93                            | 78.86                           | 93.73                           |
| 16                        | 180–199                   | 189.5                           | 90.8                             | 89.12                           | 97.22                           |
| 16                        | >200                      |                                 | 92.03                            | 92.26                           | 98.69                           |
| 20                        | 2–19                      | 10.5                            | 72.14                            | 65.14                           | 79.44                           |
| 20                        | 20–39                     | 29.5                            | 69.83                            | 63.63                           | 79.44                           |
| 20                        | 40–59                     | 49.5                            | 69.87                            | 63.46                           | 79.44                           |
| 20                        | 60–79                     | 69.5                            | 71.05                            | 63.71                           | 80.23                           |
| 20                        | 80–99                     | 89.5                            | 71.66                            | 64.16                           | 80.49                           |
| 20                        | 100–119                   | 109.5                           | 79.07                            | 75.25                           | 82.81                           |
| 20                        | 120–139                   | 129.5                           | 80.06                            | 75.83                           | 84.14                           |
| 20                        | 140–159                   | 149.5                           | 75.58                            | 71.3                            | 80.23                           |
| 20                        | 160–179                   | 169.5                           | 87.31                            | 82.21                           | 93.34                           |
| 20                        | 180–199                   | 189.5                           | 92.95                            | 91.75                           | 97.51                           |
| 20                        | >200                      |                                 | 94.39                            | 93.73                           | 98.76                           |

| Duration<br>(days) | Water depth<br>range (cm) | Water depth<br>midpoint<br>(cm) | Relative<br>yield loss<br>(mean) | Relative<br>yield loss<br>(q25) | Relative<br>yield loss<br>(q75) |
|--------------------|---------------------------|---------------------------------|----------------------------------|---------------------------------|---------------------------------|
| Maturity stage     |                           |                                 |                                  |                                 |                                 |
| 4                  | 2–19                      | 10.5                            | 39.63                            | 30.69                           | 47.92                           |
| 4                  | 20–39                     | 29.5                            | 36.61                            | 29.87                           | 40.48                           |
| 4                  | 40–59                     | 49.5                            | 36.2                             | 29.66                           | 39.57                           |
| 4                  | 60–79                     | 69.5                            | 37.64                            | 31.2                            | 41.43                           |
| 4                  | 80–99                     | 89.5                            | 38.85                            | 32.5                            | 42.92                           |
| 4                  | 100–119                   | 109.5                           | 46.2                             | 38.36                           | 52.23                           |
| 4                  | 120–139                   | 129.5                           | 46.12                            | 39                              | 52.2                            |
| 4                  | 140–159                   | 149.5                           | 55.1                             | 40.97                           | 60                              |
| 4                  | 160–179                   | 169.5                           | 69                               | 44.6                            | 92.78                           |
| 4                  | 180–199                   | 189.5                           | 70.39                            | 44.6                            | 94.67                           |
| 4                  | >200                      |                                 | 70.73                            | 44.6                            | 95.36                           |
| 8                  | 2–19                      | 10.5                            | 41.56                            | 33.04                           | 49.86                           |
| 8                  | 20–39                     | 29.5                            | 38.52                            | 31.2                            | 43.33                           |
| 8                  | 40–59                     | 49.5                            | 38.01                            | 30.77                           | 41.14                           |
| 8                  | 60–79                     | 69.5                            | 39.02                            | 31.7                            | 42.14                           |
| 8                  | 80–99                     | 89.5                            | 40.12                            | 34.42                           | 44.71                           |
| 8                  | 100–119                   | 109.5                           | 47.87                            | 40.8                            | 55.55                           |
| 8                  | 120–139                   | 129.5                           | 47.78                            | 41.12                           | 55.6                            |
| 8                  | 140–159                   | 149.5                           | 56.12                            | 42.92                           | 59.32                           |
| 8                  | 160–179                   | 169.5                           | 69.4                             | 45.11                           | 92.78                           |
| 8                  | 180–199                   | 189.5                           | 70.79                            | 45.11                           | 94.67                           |
| 8                  | >200                      |                                 | 71.13                            | 45.11                           | 95.36                           |
| 12                 | 2–19                      | 10.5                            | 56.63                            | 44.1                            | 71.08                           |
| 12                 | 20–39                     | 29.5                            | 53.73                            | 40.48                           | 67.48                           |
| 12                 | 40–59                     | 49.5                            | 53.61                            | 40.48                           | 67.39                           |
| 12                 | 60–79                     | 69.5                            | 54                               | 40.48                           | 67.65                           |
| 12                 | 80–99                     | 89.5                            | 54.89                            | 42.02                           | 69.16                           |
| 12                 | 100–119                   | 109.5                           | 61.64                            | 52.89                           | 71.41                           |
| 12                 | 120–139                   | 129.5                           | 61.95                            | 54.25                           | 71.37                           |
| 12                 | 140–159                   | 149.5                           | 67.87                            | 56.12                           | 75.13                           |
| 12                 | 160–179                   | 169.5                           | 78.95                            | 61.38                           | 92.78                           |
| 12                 | 180–199                   | 189.5                           | 80.92                            | 61.38                           | 95.9                            |
| 12                 | >200                      |                                 | 81.44                            | 61.38                           | 98.69                           |
| 16                 | 2–19                      | 10.5                            | 64.18                            | 56.12                           | 73.28                           |
| 16                 | 20–39                     | 29.5                            | 62.32                            | 56.12                           | 73.17                           |
| 16                 | 40–59                     | 49.5                            | 62.47                            | 56.12                           | 73.17                           |
| 16                 | 60–79                     | 69.5                            | 62.81                            | 56.12                           | 73.28                           |
| 16                 | 80–99                     | 89.5                            | 63.48                            | 56.12                           | 73.28                           |
| 16                 | 100–119                   | 109.5                           | 67.4                             | 57.28                           | 74.2                            |
| 16                 | 120–139                   | 129.5                           | 67.28                            | 57.78                           | 74.2                            |
| 16                 | 140–159                   | 149.5                           | 71.24                            | 61.51                           | 76.01                           |
| 16                 | 160–179                   | 169.5                           | 83.06                            | 72.82                           | 93.76                           |
| 16                 | 180–199                   | 189.5                           | 85.92                            | 75.55                           | 97.64                           |
| 16                 | >200                      |                                 | 86.57                            | 75.55                           | 98.8                            |
| 20                 | 2–19                      | 10.5                            | 66.61                            | 56.12                           | 75.2                            |
| 20                 | 20–39                     | 29.5                            | 64.89                            | 56.12                           | 74.87                           |
| 20                 | 40–59                     | 49.5                            | 64.99                            | 56.12                           | 74.87                           |
| 20                 | 60–79                     | 69.5                            | 65.87                            | 56.12                           | 76.2                            |
| 20                 | 80–99                     | 89.5                            | 66.64                            | 56.12                           | 76.55                           |
| 20                 | 100–119                   | 109.5                           | 71.11                            | 58.38                           | 80.07                           |
| 20                 | 120–139                   | 129.5                           | 71.56                            | 60.68                           | 80.76                           |
| 20                 | 140–159                   | 149.5                           | 72.35                            | 64.74                           | 81.28                           |
| 20                 | 160–179                   | 169.5                           | 84.44                            | 79.71                           | 93.34                           |
| 20                 | 180–199                   | 189.5                           | 87.73                            | 82.19                           | 98.08                           |
| 20                 | >200                      |                                 | 88.44                            | 82.19                           | 99                              |

## Bibliography

- Breiman, L.: Random Forests, *Machine Learning*, 45, 5–32, 2001.
- Breiman, L., Friedman, J., Olshen, R., and Stone, C. J.: *Classification and Regression Trees*, 1st ed., Chapman and Hall/CRC, <https://doi.org/10.1201/9781315139470>, 1984.
- Bureau of Registration Administration Thailand (BORA): Population Statistics for 2021: Village Level (โครงสร้างข้อมูลสถิติจำนวนประชากร: ระดับหมู่บ้าน), 2021.
- Bürkner, P.-C.: brms (2.22.0): Special Family Functions for brms Models, 2017a.
- Bürkner, P.-C.: brms: An R Package for Bayesian Multilevel Models using Stan, *J. Stat. Soft.*, 80, <https://doi.org/10.18637/jss.v080.i01>, 2017b.
- Chau, V. N., Cassells, S., and Holland, J.: Economic impact upon agricultural production from extreme flood events in Quang Nam, central Vietnam, *Nat Hazards*, 75, 1747–1765, <https://doi.org/10.1007/s11069-014-1395-x>, 2015.
- Dutta, D., Herath, S., and Musiak, K.: A mathematical model for flood loss estimation, *Journal of Hydrology*, 277, 24–49, [https://doi.org/10.1016/S0022-1694\(03\)00084-2](https://doi.org/10.1016/S0022-1694(03)00084-2), 2003.
- Elmer, F., Thielen, A. H., Pech, I., and Kreibich, H.: Influence of flood frequency on residential building losses, *Nat. Hazards Earth Syst. Sci.*, 10, 2145–2159, <https://doi.org/10.5194/nhess-10-2145-2010>, 2010.
- ESRI: ESRI Shaded Relief, n.d.
- Federal Emergency Management Agency (FEMA): Hazus Flood Model Technical Manual 2.1: Multi-hazard Loss Estimation Methodology Flood Model, 2020.
- Ganji, Z., Shokoohi, A., and Samani, J. M. V.: Developing an agricultural flood loss estimation function (case study: Rice), *Natural Hazards*, 64, 405–419, <https://doi.org/10.1007/s11069-012-0250-1>, 2012.
- Gelman, A., Carlin, J. B., Stern, H. S., Dunson, D. B., Vehtari, A., and Rubin, D. B.: *Bayesian Data Analysis*, 3rd ed., Chapman and Hall/CRC, 2013.
- Geo-Informatics and Space Technology Development Agency (GISTDA): Thailand Flood Monitoring System, 2023.
- GISTA The Thai Space Agency: Thailand - Inland Waters, 2018.
- Gneiting, T. and Katzfuss, M.: Probabilistic Forecasting, *Annu. Rev. Stat. Appl.*, 1, 125–151, <https://doi.org/10.1146/annurev-statistics-062713-085831>, 2014.
- Hastie, T., Tibshirani, R., and Friedman, J.: *The Elements of Statistical Learning*, Springer New York, New York, NY, <https://doi.org/10.1007/978-0-387-84858-7>, 2009.
- Hendrawan, V. S. A. and Komori, D.: Developing flood vulnerability curve for rice crop using remote sensing and hydrodynamic modeling, *International Journal of Disaster Risk Reduction*, 54, <https://doi.org/10.1016/j.ijdrr.2021.102058>, 2021.
- Hothorn, T. and Zeileis, A.: partykit: A Modular Toolkit for Recursive Partytioning in R, *Journal of Machine Learning Research*, 16, 3905–3909, 2015.
- Hothorn, T. and Zeileis, A.: partykit: A Toolkit for Recursive Partytioning, <https://doi.org/10.32614/CRAN.package.partykit>, 2023.
- Hothorn, T., Hornik, K., and Zeileis, A.: Unbiased Recursive Partitioning: A Conditional Inference Framework, *Journal of Computational and Graphical Statistics*, 15, 651–674, <https://doi.org/10.1198/106186006X133933>, 2006.
- Huizinga, J., de Moel, H., and Szweczyk, W.: Global flood depth-damage functions: methodology and the database with guidelines., Publications Office of the European Union, Luxembourg, 2017.
- Hussain, Sk. G.: Decision support system for assessing rice yield losses from annual flooding in Bangladesh. A dissertation submitted to the Graduate Division of the University of Hawaii in partial fulfillment to the requirements for the Degree of Doctor of Philosophy in Agronomy and Soil Science, 1995.
- Intarathaiwong, S. and Vudhivanich, V.: Study on rice yield reduction due to flooding, *Kasetsart Engineering Journal*, 10, 97–107, 1996.

James, G., Witten, D., Hastie, T., and Tibshirani, R.: An introduction to statistical learning with applications in R, 1st ed., Springer Science+Business Media, New York, USA, 426 pp., [https://doi.org/10.1007/978-1-4614-7138-7\\_1](https://doi.org/10.1007/978-1-4614-7138-7_1), 2013.

Jordan, A., Krüger, F., and Lerch, S.: Evaluating Probabilistic Forecasts with **scoringRules**, J. Stat. Soft., 90, <https://doi.org/10.18637/jss.v090.i12>, 2019.

Kotera, A. and Nawata, E.: Role of plant height in the submergence tolerance of rice: A simulation analysis using an empirical model, Agricultural Water Management, 89, 49–58, <https://doi.org/10.1016/j.agwat.2006.12.002>, 2007.

Krüger, F., Lerch, S., Thorarinsdottir, T., and Gneiting, T.: Predictive Inference Based on Markov Chain Monte Carlo Output, Int Statistical Rev, 89, 274–301, <https://doi.org/10.1111/insr.12405>, 2021.

Kwak, Y., Arifuzzanman, B., and Iwami, Y.: Prompt Proxy Mapping of Flood Damaged Rice Fields Using MODIS-Derived Indices, Remote Sensing, 7, 15969–15988, <https://doi.org/10.3390/rs71215805>, 2015.

Matheson, J. E. and Winkler, R. L.: Scoring Rules for Continuous Probability Distributions, Management Science, 22, 1087–1096, <https://doi.org/10.1287/mnsc.22.10.1087>, 1976.

McElreath, R.: Statistical Rethinking: A Bayesian Course with Examples in R and Stan, 1st ed., Chapman and Hall/CRC, New York, USA, 2016.

Meinshausen, N.: Quantile Regression Forests, Journal of Machine Learning Research, 7, 983–999, 2006.

Mekong River Commission Secretariat (MRCS): Flood Damages, Benefits and Flood Risk in Focal Areas The Flood Management and Mitigation Programme, Component 2: Structural Measures & Flood Proofing in the Lower Mekong Basin. Draft Final Report, Volume 2C, 2009.

Merz, B., Kreibich, H., Schwarze, R., and Thieken, A.: Review article “Assessment of economic flood damage,” Nat. Hazards Earth Syst. Sci., 10, 1697–1724, <https://doi.org/10.5194/nhess-10-1697-2010>, 2010.

Merz, B., Kreibich, H., and Lall, U.: Multi-variate flood damage assessment: a tree-based data-mining approach, Nat. Hazards Earth Syst. Sci., 13, 53–64, <https://doi.org/10.5194/nhess-13-53-2013>, 2013.

Ministry of the Interior. Department of Community Development (MOI-CDD): 2021 Basic Needs Data. Translated from Thai: ข้อมูลความจำเป็นพื้นฐาน (จปฐ). The data was made available., 2021.

Naresuan University Geoinformatics Community and Sharing (NUGIS): Free and Open Source GIS Data: (7) Village Location, (10) Roads, 2014.

Nguyen, N. Y., Ichikawa, Y., and Ishidaira, H.: Establishing flood damage functions for agricultural crops using estimated inundation depth and flood disaster statistics in data-scarce regions, Hydrological Research Letters, 11, 12–18, <https://doi.org/10.3178/hrl.11.12>, 2017.

Nguyen, N. Y., Kha, D. D., and Ichikawa, Y.: Developing a multivariable lookup table function for estimating flood damages of rice crop in Vietnam using a secondary research approach, International Journal of Disaster Risk Reduction, 58, 102208, <https://doi.org/10.1016/j.ijdr.2021.102208>, 2021.

Ospina, R. and Ferrari, S. L. P.: Inflated beta distributions, Stat Papers, 51, 111–126, <https://doi.org/10.1007/s00362-008-0125-4>, 2010.

R Core Team: R: A Language and Environment for Statistical Computing, 2024.

Ramsar Site Information Service (RSIS): Lower Songkhram River. Ramsar Site Boundaries (shapefile), 2020.

Royal Forest Department, Community Forest Management Promotion Section: List of community forests receiving subsidies: Community forest management activities to develop quality of life for Fiscal year 2020-2022, including 805 community forests (translated). รายชื่อป่าชุมชนที่ได้รับเงินอุดหนุนกิจกรรมบริหารจัดการป่าชุมชนเพื่อพัฒนาคุณภาพชีวิต ปีงบประมาณ พ.ศ. 2563 จำนวน 805 ป่าชุมชน, 2022.

Royal Thai Survey Department: Thailand: Subnational Administrative Boundaries. Updated: 27 January 2022, 2022.

Samantaray, D., Chatterjee, C., Singh, R., Gupta, P. K., and Panigrahy, S.: Flood risk modeling for optimal rice planning for delta region of Mahanadi river basin in India, Nat Hazards, 76, 347–372, <https://doi.org/10.1007/s11069-014-1493-9>, 2015.

Schoppa, L., Sieg, T., Vogel, K., Zöller, G., and Kreibich, H.: Probabilistic Flood Loss Models for Companies, *Water Resources Research*, 56, e2020WR027649, <https://doi.org/10.1029/2020WR027649>, 2020.

Schröter, K., Kreibich, H., Vogel, K., Riggelsen, C., Scherbaum, F., and Merz, B.: How useful are complex flood damage models?, *Water Resources Research*, 50, 3378–3395, <https://doi.org/10.1002/2013WR014396>, 2014.

Shrestha, B. B., Okazumi, T., Miyamoto, M., and Sawano, H.: Flood damage assessment in the Pampanga River basin of the Philippines, *J. Flood Risk Manag.*, 9, 355–369, <https://doi.org/10.1111/jfr3.12174>, 2016.

Shrestha, B. B., Kawasaki, A., and Zin, W. W.: Development of flood damage functions for agricultural crops and their applicability in regions of Asia, *Journal of Hydrology: Regional Studies*, 36, 100872, <https://doi.org/10.1016/j.ejrh.2021.100872>, 2021.

Sieg, T., Vogel, K., Merz, B., and Kreibich, H.: Tree-based flood damage modeling of companies: Damage processes and model performance, *Water Resources Research*, 53, 6050–6068, <https://doi.org/10.1002/2017WR020784>, 2017.

Sultana, Z., Sieg, T., Kellermann, P., Müller, M., and Kreibich, H.: Assessment of Business Interruption of Flood-Affected Companies Using Random Forests, *Water*, 10, 1049, <https://doi.org/10.3390/w10081049>, 2018.

Thai Department of Disaster Prevention and Mitigation, Ministry of Interior: Flood Statistics: Recurring droughts and floods, 2017.

Thai Ministry of Labor. Wage Committee: Royal Gazette Announcement of the Wage Committee. Minimum wage rate (No. 11). Volume 139, Special Section 221 D. 19 September 2022, 2022.

Wagenaar, D., De Jong, J., and Bouwer, L. M.: Multi-variable flood damage modelling with limited data using supervised learning approaches, *Nat. Hazards Earth Syst. Sci.*, 17, 1683–1696, <https://doi.org/10.5194/nhess-17-1683-2017>, 2017.

Wagenaar, D., Kasmalkar, I., and Lallemand, D.: HAZDEM: Hazard Analysis Zones global Digital Elevation Model: 30m x 30m, Disaster Risk Analytics for Society Lab, Earth Observatory of Singapore, Nanyang Technological University, n.d.

Wei, P., Lu, Z., and Song, J.: Variable importance analysis: A comprehensive review, *Reliability Engineering & System Safety*, 142, 399–432, <https://doi.org/10.1016/j.ress.2015.05.018>, 2015.

White, A. P. and Liu, W. Z.: Bias in information-based measures in decision tree induction, *Mach Learn*, 15, 321–329, <https://doi.org/10.1007/BF00993349>, 1994.

Win, S., Zin, W. W., Kawasaki, A., and San, Z. M. L. T.: Establishment of flood damage function models: A case study in the Bago River Basin, Myanmar, *International Journal of Disaster Risk Reduction*, 28, 688–700, <https://doi.org/10.1016/j.ijdrr.2018.01.030>, 2018.

World Bank Group (WBG): Poverty & Equity Brief: East Asia & Pacific. Thailand, 2023.

Yamane, T.: Statistics, An Introductory Analysis, 2nd ed., Harper and Row/John Weatherhill, Inc., New York, Evanston & London / Tokyo, 1967.
